# Supplementary material for: Genetic, Clinical Underpinnings of Brain Change Along Two Neuroanatomical Dimensions of Clinically-defined Alzheimer’s Disease
Source: bioRxiv or medRxiv preprint supplement (doi:10.1101/2022.09.16.508329), 2023-10-09
Supplement: Supplementary file [file media-1.pdf]

# 1 Genetic, clinical underpinnings of subtle early brain change along Alzheimer's 2 dimensions

3  
4 Junhao Wen<sup>1\*</sup>, Zhijian Yang<sup>1</sup>, Ilya M. Nasrallah<sup>1</sup>, Yuhan Cui<sup>1</sup>, Guray Erus<sup>1</sup>, Dhivya Srinivasan<sup>1</sup>, Ahmed  
5 Abdulkadir<sup>1,2</sup>, Elizabeth Mamourian<sup>1</sup>, Gyujoon Hwang<sup>1</sup>, Ashish Singh<sup>1</sup>, Mark Bergman<sup>1</sup>, Jingxuan Bao<sup>3</sup>,  
6 Erdem Varol<sup>4</sup>, Zhen Zhou<sup>1</sup>, Aleix Boquet-Pujadas<sup>5</sup>, Jiong Chen<sup>1</sup>, Arthur Toga<sup>6</sup>, Andrew J. Saykin<sup>7</sup>,  
7 Timothy J. Hohman<sup>8</sup>, Paul M. Thompson<sup>9</sup>, Sylvia Villeneuve<sup>10</sup>, Randy Gollub<sup>11</sup>, Aristeidis Sotiras<sup>12</sup>,  
8 Katharina Wittfeld<sup>13,14</sup>, Hans J. Grabe<sup>13,14</sup>, Duygu Tosun<sup>15</sup>, Murat Bilgel<sup>16</sup>, Yang An<sup>16</sup>, Daniel S. Marcus<sup>17</sup>,  
9 Pamela LaMontagne<sup>17</sup>, Susan R. Heckbert<sup>18</sup>, Thomas R. Austin<sup>18</sup>, Lenore J. Launer<sup>19</sup>, Mark Espeland<sup>20</sup>,  
10 Colin L Masters<sup>21</sup>, Paul Maruff<sup>21</sup>, Jurgen Fripp<sup>22</sup>, Sterling C. Johnson<sup>23</sup>, John C. Morris<sup>24</sup>, Marilyn S.  
11 Albert<sup>25</sup>, R. Nick Bryan<sup>26</sup>, Susan M. Resnick<sup>16</sup>, Luigi Ferrucci<sup>27</sup>, Yong Fan<sup>1</sup>, Mohamad Habes<sup>28</sup>, David  
12 Wolk<sup>1,29</sup>, Li Shen<sup>3</sup>, Haochang Shou<sup>1,30</sup>, Christos Davatzikos<sup>1\*</sup>

13  
14 <sup>1</sup>Artificial Intelligence in Biomedical Imaging Laboratory (AIBIL), Center for AI and Data Science for Integrated  
15 Diagnostics (AI<sup>2</sup>D), Perelman School of Medicine, University of Pennsylvania, Philadelphia, USA.

16 <sup>2</sup>Research Lab in Neuro-imaging of the Department of Clinical Neurosciences at Lausanne University Hospital,  
17 Lausanne, Switzerland

18 <sup>3</sup>Department of Biostatistics, Epidemiology and Informatics University of Pennsylvania Perelman School of Medicine,  
19 Philadelphia, USA

20 <sup>4</sup>Department of Statistics, Center for Theoretical Neuroscience, Zuckerman Institute, Columbia University, New York,  
21 New York

22 <sup>5</sup>Biomedical Imaging Group, EPFL, Lausanne, Switzerland

23 <sup>6</sup>Laboratory of Neuro Imaging, Stevens Neuroimaging and Informatics Institute, Keck School of Medicine of USC,  
24 University of Southern California, Marina del Rey, California

25 <sup>7</sup>Radiology and Imaging Sciences, Center for Neuroimaging, Department of Radiology and Imaging Sciences,  
26 Indiana Alzheimer's Disease Research Center and the Melvin and Bren Simon Cancer Center, Indiana University  
27 School of Medicine, Indianapolis

28 <sup>8</sup>Vanderbilt Memory and Alzheimer's Center, Vanderbilt Genetics Institute, Department of Neurology, Vanderbilt  
29 University Medical Center, Nashville, TN USA

30 <sup>9</sup>Imaging Genetics Center, Mark and Mary Stevens Neuroimaging and Informatics Institute, Keck School of  
31 Medicine of USC, University of Southern California, Marina del Rey, California

32 <sup>10</sup>Douglas Mental Health University Institute, McGill University, Montréal, Québec, Canada

33 <sup>11</sup>Athinoula A. Martinos Center for Biomedical Imaging, Massachusetts General Hospital, Harvard Medical School,  
34 Charlestown, Massachusetts

35 <sup>12</sup>Department of Radiology and Institute for Informatics, Washington University School of Medicine, St. Louis,  
36 USA

37 <sup>13</sup>German Center for Neurodegenerative Diseases (DZNE), Site Rostock/ Greifswald, Greifswald, Germany

38 <sup>14</sup>Department of Psychiatry and Psychotherapy, University Medicine Greifswald, Greifswald, Germany

39 <sup>15</sup>Department of Radiology and Biomedical Imaging, University of California, San Francisco, CA, USA

40 <sup>16</sup>Laboratory of Behavioral Neuroscience, National Institute on Aging, NIH, USA

41 <sup>17</sup>Department of Radiology, Washington University School of Medicine, St. Louis, Missouri, USA

42 <sup>18</sup>Cardiovascular Health Research Unit and Department of Epidemiology, University of Washington, Seattle, WA,  
43 USA

44 <sup>19</sup>Neuroepidemiology Section, Intramural Research Program, National Institute on Aging, Bethesda, Maryland, USA

45 <sup>20</sup>Sticht Center for Healthy Aging and Alzheimer's Prevention, Wake Forest School of Medicine, Winston-Salem,  
46 North Carolina, USA

47 <sup>21</sup>Florey Institute of Neuroscience and Mental Health, The University of Melbourne, Parkville, VIC, Australia

48 <sup>22</sup>CSIRO Health and Biosecurity, Australian e-Health Research Centre CSIRO, Brisbane, Queensland, Australia

49 <sup>23</sup>Wisconsin Alzheimer's Institute, University of Wisconsin School of Medicine and Public Health, Madison,  
50 Wisconsin, USA

51 <sup>24</sup>Knight Alzheimer Disease Research Center, Washington University in St. Louis, St. Louis, MO, USA

52 <sup>25</sup>Department of Neurology, Johns Hopkins University School of Medicine, USA

53 <sup>26</sup>Department of Radiology, University of Pennsylvania, Philadelphia, USA.

54 <sup>27</sup>Translational Gerontology Branch, Longitudinal Studies Section, National Institute on Aging, National Institutes of  
55 Health, MedStar Harbor Hospital, 3001 S. Hanover Street, Baltimore, MD, 21225, USA

56 <sup>28</sup>Glenn Biggs Institute for Alzheimer's & Neurodegenerative Diseases, University of Texas Health Science Center at  
57 San Antonio, San Antonio, USA

58 <sup>29</sup>Department of Neurology and Penn Memory Center, University of Pennsylvania, Philadelphia, USA

59 <sup>30</sup>Penn Statistics in Imaging and Visualization Center, Department of Biostatistics, Epidemiology, and Informatics,  
60 Perelman School of Medicine, University of Pennsylvania, Philadelphia, USA

61

62 \*Corresponding authors:

63 Junhao Wen, Ph.D. – [junhao.wen89@gmail.com](mailto:junhao.wen89@gmail.com)

64 Christos Davatzikos, Ph.D. – [Christos.Davatzikos@pennmedicine.upenn.edu](mailto:Christos.Davatzikos@pennmedicine.upenn.edu)

65 3700 Hamilton Walk, 7<sup>th</sup> Floor, Philadelphia, PA 19104

66 **eMethod 1: Surreal-GAN: methodological considerations and advances**

67 **eMethod 2: Image quality check**

68 **eFigure 1: The age distribution of the four populations and the expression of the R1 and R2**

69 **dimensions**

70 **eFigure 2: PRS plots at baseline for the MCI/AD population**

71 **eFigure 3: QQ plots for the baseline GWAS for the MCI/AD population**

72 **eFigure 4: QQ plots for the longitudinal GWAS for the general population**

73 **eFigure 5: Tissue specificity analyses for the prioritized genes associated with the two**

74 **dimensions in the general population**

75 **eFigure 6: Single gene expression heat maps for the tissue specificity analyses in the general**

76 **population**

77 **eFigure 7: Distributions of the R1 and R2 dimensions of Surreal-GAN and the P1, P2, P3,**

78 **and P4 dimensions of Smile-GAN**

79 **eFigure 8: Best-fit model of the PRS calculation in the MCI/AD population**

80 **eTable 1: Brain association studies for the MCI/AD population from ADNI and BLSA**

81 **eTable 2: Identified genomic loci and mapped genes for baseline GWAS in the MCI/AD**

82 **population**

83 **eTable 3: Clinical association studies for the MCI/AD population from ADNI and BLSA**

84 **eTable 4: Brain association studies for the general population from UKBB**

85 **eTable 5: Clinical association studies for the general population from UKBB**

86 **eTable 6: Identified genomic loci and mapped genes for GWAS in the general population**

87 **eTable 7: Gene set enrichment analysis results in the general population**

88 **eTable 8: Brain association studies for the cognitively unimpaired (CU) population from**

89 **ADNI and BLSA**

90 **eTable 9: Clinical association studies for the cognitively unimpaired (CU) population from**

91 **ADNI and BLSA**

92 **eMethod 1: Surreal-GAN: methodological considerations and advances**

93 Surreal-GAN<sup>1</sup> is a novel deep representation learning method proposed for dissecting disease-  
 94 related neuroanatomical heterogeneity from imaging data. Compared to its precursor, the Smile-  
 95 GAN model,<sup>2</sup> Surreal-GAN follows the same principle of semi-supervised clustering but solves  
 96 several limitations of Smile-GAN. Semi-supervised clustering methods seek the so-called "*I-to-*  
 97 *k*" mapping by learning distribution transformation from cognitively unimpaired (CU) data to  
 98 patient (PT) data. The following schematic figure demonstrates the principles of Smile-GAN and  
 99 Surreal-GAN in the semi-supervised learning framework to disentangle AD neuroanatomical  
 100 heterogeneity.

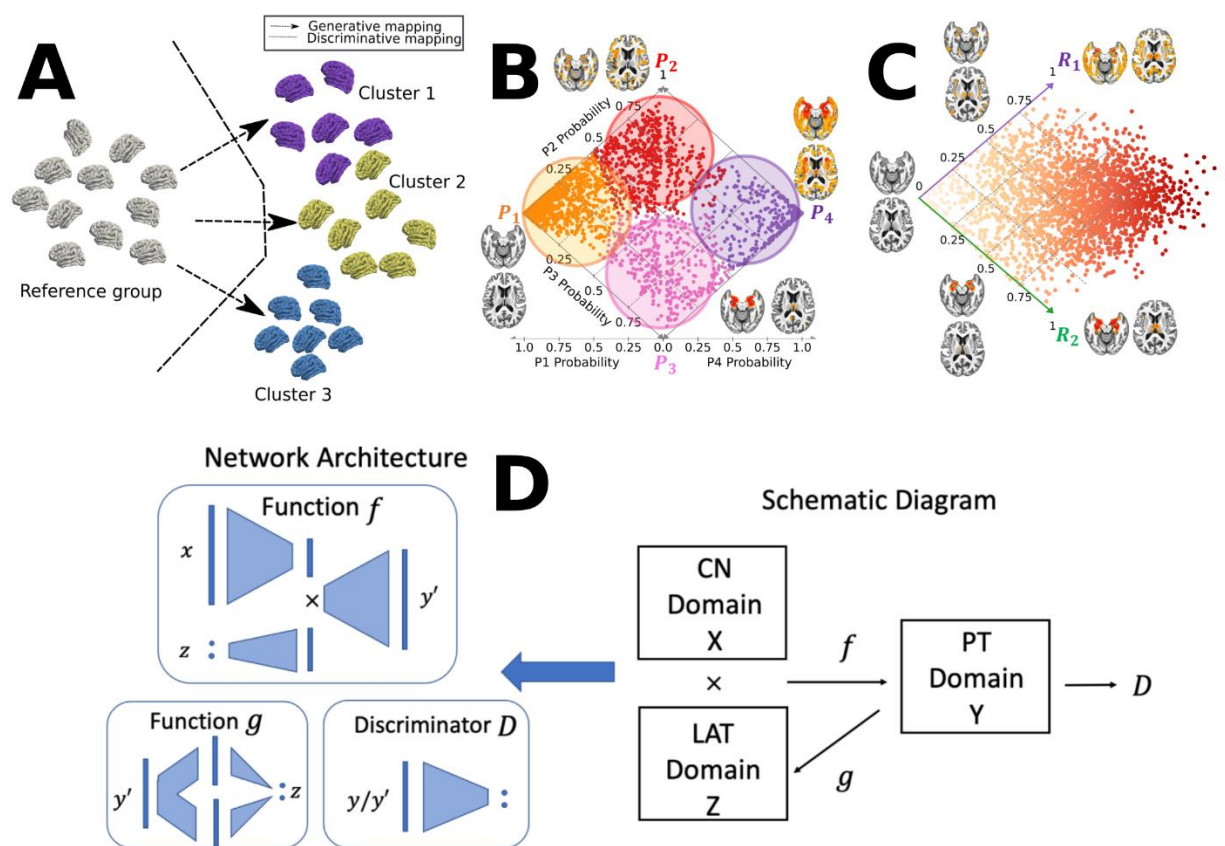

101  
 102 **Fig. A)** Schematic figures of semi-supervised clustering methods, including generative<sup>1-3</sup> and  
 103 discriminative approaches.<sup>4,5</sup> Semi-supervised clustering methods dissect the neuroanatomical  
 104 heterogeneity of brain diseases by seeking the so-called "*I-to-k*" mapping between the healthy  
 105 control (CN) group as a reference and the patient (PT) group as a target. They sought to tease out  
 106 clusters that are likely driven by distinct pathological trajectories instead of by global  
 107 similarity/dissimilarity in data. The figure is adapted from our previous work.<sup>6</sup> **B)** Conceptual  
 108 illustration of applying Smile-GAN ADNI to cluster MCI/AD participants into four hard-coded  
 109 subtypes (P1, P2, P3, and P4) and two longitudinal pathways after applying the model to  
 110 longitudinal data: P1→P2→P4; ii) P1→P3→P4. The figure is adapted from our previous work.<sup>2</sup>  
 111 **C)** Conceptual illustration of applying Surreal-GAN to ADNI to recapitulate the

112 neuroanatomical heterogeneity of MCI/AD participants into two continuous dimensional scores.  
 113 Methodological advances are to capture disease severity and heterogeneity simultaneously using  
 114 only cross-sectional data and allow the same individuals to express themselves along multiple  
 115 dimensions. The figure is adapted from our previous work.<sup>1</sup> **D)** General network architectures  
 116 (left) and schematic diagram of the semi-supervised learning (right, corresponding to Fig. A).  
 117 The figure is adapted from our previous work.<sup>1</sup>

118

119 Smile-GAN learns one transformation function,  $f$ , which generates synthesized PT data,  
 120  $\mathbf{y}' = f(\mathbf{x}, \mathbf{z})$ , from real CU data  $\mathbf{x}$  and the latent variable  $\mathbf{z}$ . The categorical variable  $\mathbf{z}$  is encoded  
 121 as an  $M$ -dimensional one-hot vector with value 1 being placed at any position with equal  
 122 probability (i.e.,  $1/k$ ). Thus,  $k$  different values of  $\mathbf{z}$  lead to  $k$  different mapping directions and  
 123 enable  $M$  subgroups clustering.

124 Surreal-GAN also learns one transformation function  $f$ , which transforms CU data  $\mathbf{x}$  to  
 125 different synthesized PT data  $\mathbf{y}' = f(\mathbf{x}, \mathbf{z})$ , with latent variable  $\mathbf{z}$  specifying distinct mapping  
 126 directions. However, compared to Smile-GAN, Surreal-GAN considers that disease  
 127 heterogeneity spatially and temporally (subtype) expands along a continuum (severity), similar to  
 128 Sustain<sup>7</sup> to a certain extent. Thus, the latent variable  $\mathbf{z}$  is modeled as a continuous variable,  
 129 allowing infinite mapping directions from CU to PT data.  $\mathbf{z} \sim p_{lat}(\mathbf{z})$  is sampled from a  
 130 multivariate uniform distribution  $U(0,1)^k$ , rather than a categorical distribution as in Smile-  
 131 GAN. Further, Surreal-GAN aims at disentangling spatial and temporal variations independently  
 132 so that each dimension of the latent variable  $\mathbf{z}$  is correlated with the severity of one relatively  
 133 homogeneous imaging pattern. In contrast, different dimensions can be associated with spatially  
 134 different imaging patterns.

135 To achieve the goals above, the objective function of Surreal-GAN consists of one  
 136 adversarial loss and other regularization terms. The adversarial loss aims at matching the  
 137 distribution of synthesized PT data,  $p_{syn}$ , and the distribution of real PT data,  $p_{PT}$ . Other  
 138 regularization terms serve the following purposes: 1) encouraging sparse transformations  
 139 (change loss); 2) reconstructing latent variables from synthesized or real PT data through the  
 140 decomposer  $g_1$  (decomposition loss) and reconstruction function  $g_2$  (reconstruction loss); 3)  
 141 boosting spatial separation of synthesized/captured patterns (orthogonality loss); 4) enforcing  
 142 positive correlations between components of  $\mathbf{z}$  and severity of synthesized patterns  
 143 (monotonicity loss and cn loss).

144 Specifically, with distributions of CU, real PT, synthesized PT data denoted as  $p_{CU}(\mathbf{x})$ ,  $p_{PT}(\mathbf{y})$   
 145 and  $p_{syn}(\mathbf{y}')$  respectively, the adversarial loss is defined as:

$$146 \quad L_{GAN}(D, f) = E_{\mathbf{y} \sim p_{PT}(\mathbf{y})}[\log(D(\mathbf{y}))] + E_{\mathbf{z} \sim p_{Lat}(\mathbf{z}), \mathbf{x} \sim p_{CN}(\mathbf{x})} [1 - \log(D(f(\mathbf{x}, \mathbf{z})))]$$

$$147 \quad = E_{\mathbf{y} \sim p_{PT}(\mathbf{y})}[\log(D(\mathbf{y}))] + E_{p_{syn}(\mathbf{y}')} [1 - \log(D(\mathbf{y}'))]$$

148 The transformation function attempts to synthesize PT data  $\mathbf{y}'$ , so that they follow similar  
 149 distributions as real PT data. The discriminator,  $D$ , tries to distinguish the synthesized PT data  
 150 from real PT data. Therefore, the discriminator is updated to maximize the adversarial loss, while  
 151 the transformation function is optimized to minimize it.

152 Other regularization terms are introduced to further regularize the transformation function  
 153  $f$ . With the assumption that the disease process will not change brain anatomy dramatically and  
 154 primarily only affect certain regions throughout most of the disease stages, the change loss is  
 155 introduced to control sparsity and distance of transformations:

$$156 \quad L_{change}(f) = E_{\mathbf{z} \sim p_{Lat}(\mathbf{z}), \mathbf{x} \sim p_{CU}(\mathbf{x})} [\|\mathbf{f}(\mathbf{x}, \mathbf{z}) - \mathbf{x}\|_1]$$

157 The decomposer  $g_1$  serves to reconstruct changes synthesized by each component:  $\mathbf{q}_i =$   
 158  $\mathbf{f}(\mathbf{x}, \mathbf{a}^i) - \mathbf{x}$ , where  $\mathbf{a}_i^i = \mathbf{z}_i$  and  $\mathbf{a}_j^i = \mathbf{0}$  for  $j \neq i$ . With  $\hat{\mathbf{q}}_{f(\mathbf{x}, \mathbf{z})} = [\mathbf{q}_1^T, \mathbf{q}_2^T, \dots, \mathbf{q}_M^T]^T$ , the  
 159 decomposition loss is defined as:

$$160 \quad L_{decom}(f, g_1) = E_{\mathbf{z} \sim p_{Lat}(\mathbf{z}), \mathbf{x} \sim p_{CN}(\mathbf{x})} [\|\mathbf{g}_1(f(\mathbf{x}, \mathbf{z})) - \hat{\mathbf{q}}_{f(\mathbf{x}, \mathbf{z})}\|_2]$$

161 The reconstruction function  $g_2$  serves to further reconstruct each component of the  
 162 sampled  $\mathbf{z}$  variable from  $g_1(f(\mathbf{x}, \mathbf{z}))$ . The function  $g$  is defined as a composition of  $g_1$  and  $g_2$ ,  
 163 with  $g(f(\mathbf{x}, \mathbf{z})) = [g_2(g_1(f(\mathbf{x}, \mathbf{z}))_{0:S}), \dots, g_2(g_1(f(\mathbf{x}, \mathbf{z}))_{S*(M-1):S*M})]^T$  ( $S$  = number of  
 164 ROIs), and the reconstruction loss is defined as

$$165 \quad L_{recons}(f, g) = L_{recons}(f, g_1, g_2) = E_{\mathbf{z} \sim p_{Lat}(\mathbf{z}), \mathbf{x} \sim p_{CN}(\mathbf{x})} [\|\mathbf{g}(f(\mathbf{x}, \mathbf{z})) - \mathbf{z}\|_2]$$

166 The orthogonality loss aims to boost changes led each component,  $\mathbf{q}_i$ , to be relatively  
 167 orthogonal to each other. For this purpose, a matrix  $\mathbf{A}_{f(\mathbf{x}, \mathbf{z})}$  is constructed with the  $i_{th}$  column  
 168  $\mathbf{A}_{f(\mathbf{x}, \mathbf{z}), i} = \mathbf{q}_i / \|\mathbf{q}_i\|_2$ , and the orthogonality loss is defined as:

$$169 \quad L_{ortho}(f) = E_{\mathbf{z} \sim p_{Lat}(\mathbf{z}), \mathbf{x} \sim p_{CU}(\mathbf{x})} [\|\mathbf{A}_{f(\mathbf{x}, \mathbf{z})}^T \mathbf{A}_{f(\mathbf{x}, \mathbf{z})} - \mathbf{I}\|_F]$$

170 To encourage a positive correlation between the severity of the synthesized pattern and  
 171 the value of each component  $\mathbf{z}_i$ , another latent variable  $\mathbf{z}' \sim p_{sev}(\mathbf{z}'|\mathbf{z})$  is sampled conditioned on  
 172 previously sampled  $\mathbf{z}$  variables, such that  $\mathbf{z}'_i \geq \mathbf{z}_i$  for any  $1 \leq i \leq k$ . With these two sampled  
 173 latent variables, the monotonicity loss is defined as:

$$174 \quad L_{mono}(f) = E_{\mathbf{z} \sim p_{Lat}(\mathbf{z}), \mathbf{z}' \sim p_{sev}(\mathbf{z}'|\mathbf{z}), \mathbf{x} \sim p_{CU}(\mathbf{x})} [\| \max(|f(\mathbf{x}, \mathbf{z}) - \mathbf{x}| - |f(\mathbf{x}, \mathbf{z}') - \mathbf{x}|, 0) \|_2]$$

175 The cn loss is introduced to further ensure that a small  $\mathbf{z}$  variable lead to mild patterns. By letting  
 176  $p_{cn}(\mathbf{z}) = U(0, 0.05)^k$  to be a multivariate uniform distribution, the cn loss is defined as:

$$177 \quad L_{cn}(f) = E_{\mathbf{z}^{cn} \sim p_{cn}(\mathbf{z}), \mathbf{x} \sim p_{CU}(\mathbf{x})} [\| f(\mathbf{x}, \mathbf{z}^{cn}) - \mathbf{x} \|_1]$$

178 With all loss functions introduced above, the full objective of Surreal-GAN can be  
 179 written as

$$180 \quad L(D, f, g_1, g_2) = L_{GAN}(D, f) + \gamma L_{change}(f) + \kappa L_{decom}(f, g_1) + \zeta L_{recon}(f, g_1, g_2) \\ + \lambda L_{ortho}(f) + \mu L_{mono}(f) + \eta L_{cn}(f)$$

181 With  $\gamma, \kappa, \zeta, \lambda, \mu$ , and  $\eta$  being hyperparameters that control the relative importance of each loss  
 182 function during the training process. More details of parameter selections can be found in the  
 183 Surreal-GAN paper.<sup>1</sup>

184 Through the training process, parametrized functions  $f, g_1$ , and  $g_2$  are updated to satisfy  
 185 that:

$$186 \quad f, g_1, g_2 = \arg \min_{f, g} \max_D L(D, f, g_1, g_2)$$

187 More importantly, after the training process, the function  $g$ , a composition of  $g_1$  and  $g_2$ ,  
 188 can be applied to unseen PT data to infer the latent variable, which is referred to as the R-indices  
 189 (i.e., dimensions) of PT data.

190

191 **eMethod 2: Image quality check**

192 Raw T1-weighted MRIs were first quality checked (QC) for motion, image artifacts, or restricted  
193 field-of-view. Another QC was performed as follows: First, the images were examined by  
194 manually evaluating for pipeline failures (e.g., poor brain extraction, tissue segmentation, and  
195 registration errors). Furthermore, a second step automatically flagged images based on outlying  
196 values of quantified metrics (i.e., PSC values); those flagged images were re-evaluated.

197

198



199 **eFigure 1: The age distribution of the four populations and the expression of the R1 and R2**  
 200 **dimensions**

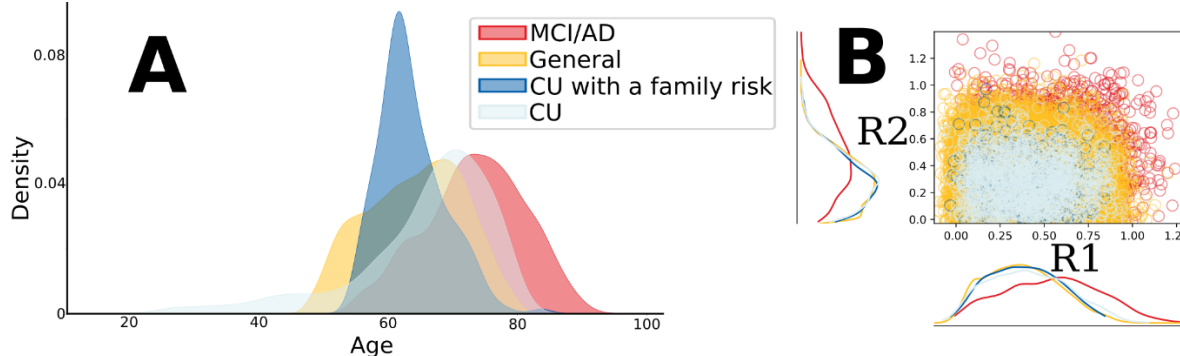

201 **A)** Four different populations were used in this study: *i*) the *MCI/AD population* from ADNI<sup>8</sup>  
 202 and BLSA,<sup>9</sup> which represented the symptomatic population (age distribution:  $73.45 \pm 7.69$ ); *ii*) the  
 203 *general population* from UKBB,<sup>10</sup> which included participants with high AD risks based on  
 204 family history of AD (i.e., proxy-AD,  $N=10,189$  out of 39,575) and many other disease  
 205 diagnoses (age distribution:  $64.12 \pm 7.54$ ); *iii*) the *cognitively unimpaired (CU) population* from  
 206 ADNI<sup>8</sup> and BLSA,<sup>9</sup> which endorsed the normative aging elders without any cognitive decline at  
 207 baseline (age distribution:  $65.75 \pm 10.90$ ); *iv*) the *CU with a family risk population*, which  
 208 recruited 343 CU participants that had a first-relative family history of AD diagnosis (age  
 209 distribution:  $63.62 \pm 5.05$ ). Refer to Method 1 in the main manuscript for more details. **B)** The scatter plot for the  
 210 R1 and R2 dimensions in the four populations is presented, together with the kernel density  
 211 estimate plot for each population. The two dimensions are highly expressed in the MCI/AD  
 212 population and gradually less manifested in the three asymptomatic populations: the general  
 213 population, the CU population, and the CU with a family history population. Of note, some  
 214 participants showed negative values for the two neuroanatomical dimensions. These participants  
 215 did not express much for this dimension and can be interpreted as super normal individuals  
 216 compared to the MCI/AD patients from ADNI in the training sample.  
 217  
 218

219 **eFigure 2: PRS plots at baseline for the MCI/AD population**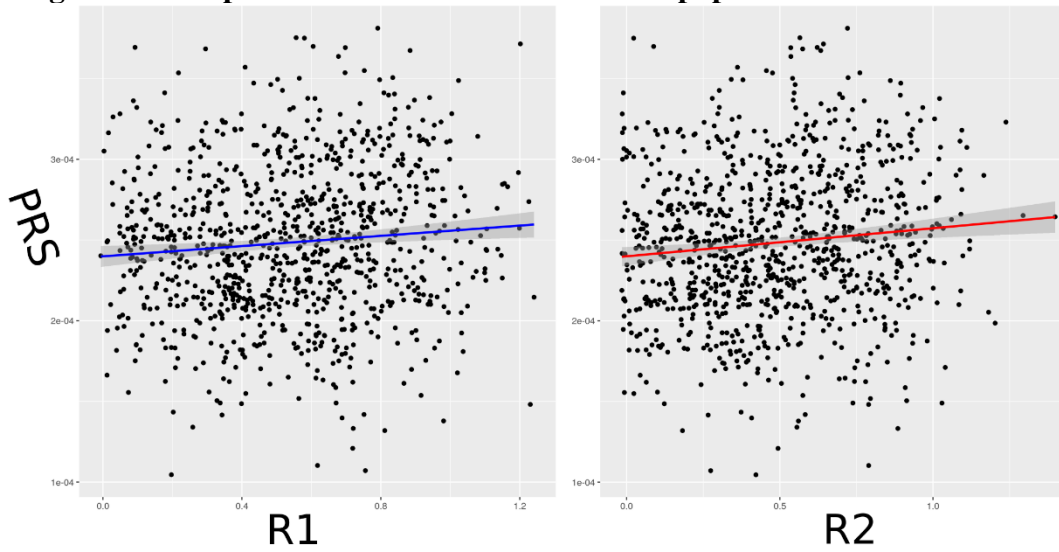

235 We fit a linear regression model to associate the PRS with the two dimensions (**Method 6F** in  
236 the main manuscript). The results showed a slightly stronger positive association with the R2  
237 dimension [ $r=0.11$ ,  $-\log_{10}(\text{P-value})=3.14$ ] than with the R1 dimension [ $r=0.09$ ,  $-\log_{10}(\text{P-}$   
238  $\text{value})=2.31$ ].

239 **eFigure 3: QQ plots for the baseline GWAS for the MCI/AD population**

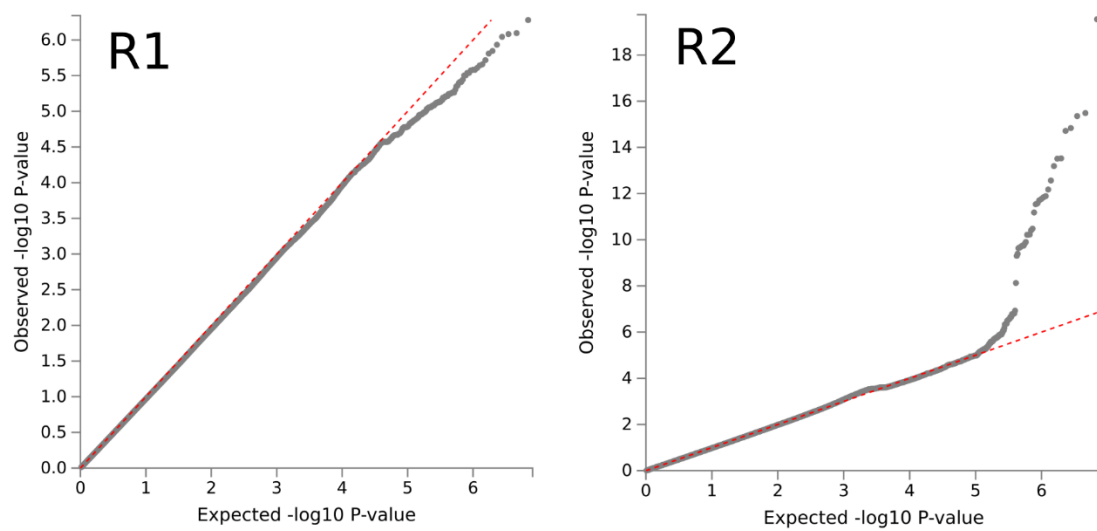

240

241 The FUMA online platform generates the QQ plot of the two GWAS for the R1 and R2

242 neuroanatomical dimensions.

243 **eFigure 4: QQ plots for the longitudinal GWAS for the general population**

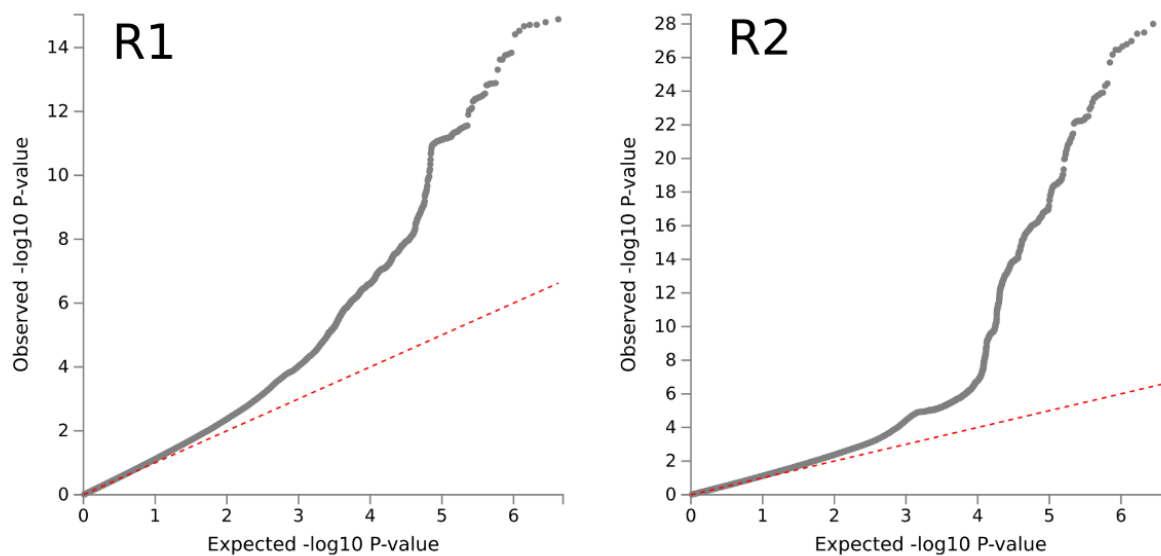

244

245 The FUMA online platform generates the QQ plot of the two GWAS for the R1 and R2

246 neuroanatomical dimensions.

247

248 **eFigure 5: Tissue specificity analyses for the prioritized genes in the two dimensions in the**  
 249 **general population**

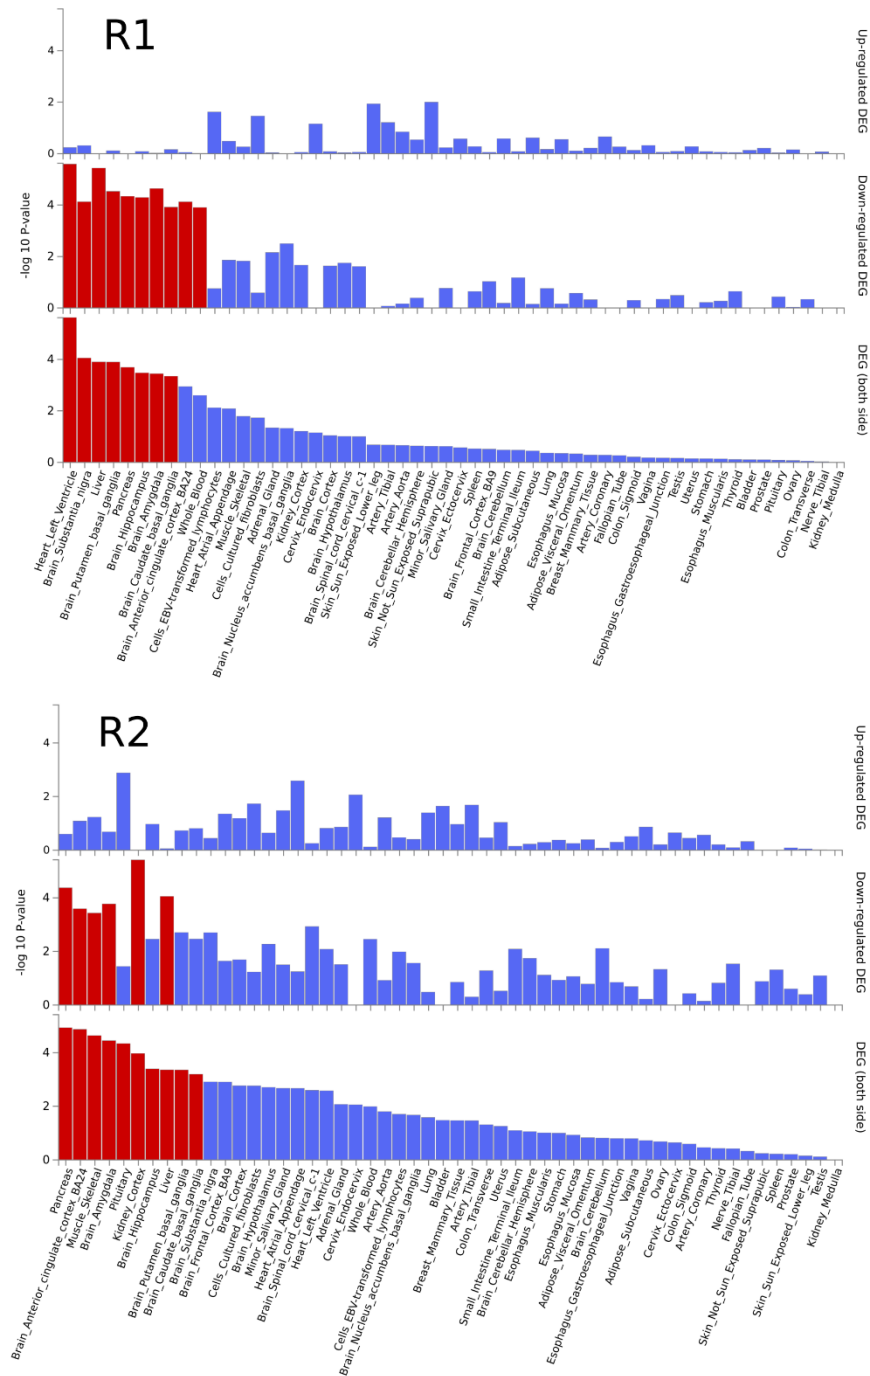

250 We performed a prioritized tissue specificity analysis using the mapped/annotated genes.  
 251 Significantly enriched differentially expressed gene sets (DEG) are highlighted in red. The  
 252 *GENE2FUNC*<sup>11</sup> pipeline from FUMA was performed to examine the overrepresentation of  
 253 prioritized genes in pre-defined DEGs (up-regulated, down-regulated, and both-side DEGs) from  
 254 different gene expression data. The input genes (Fig. 2C) were tested against each DEG using the  
 255 hypergeometric test.  
 256



264 **eFigure 7: The longitudinal rate of change of R1 and R2 neuroanatomical dimensions of**  
 265 **brain atrophy in the MCI/AD population.**

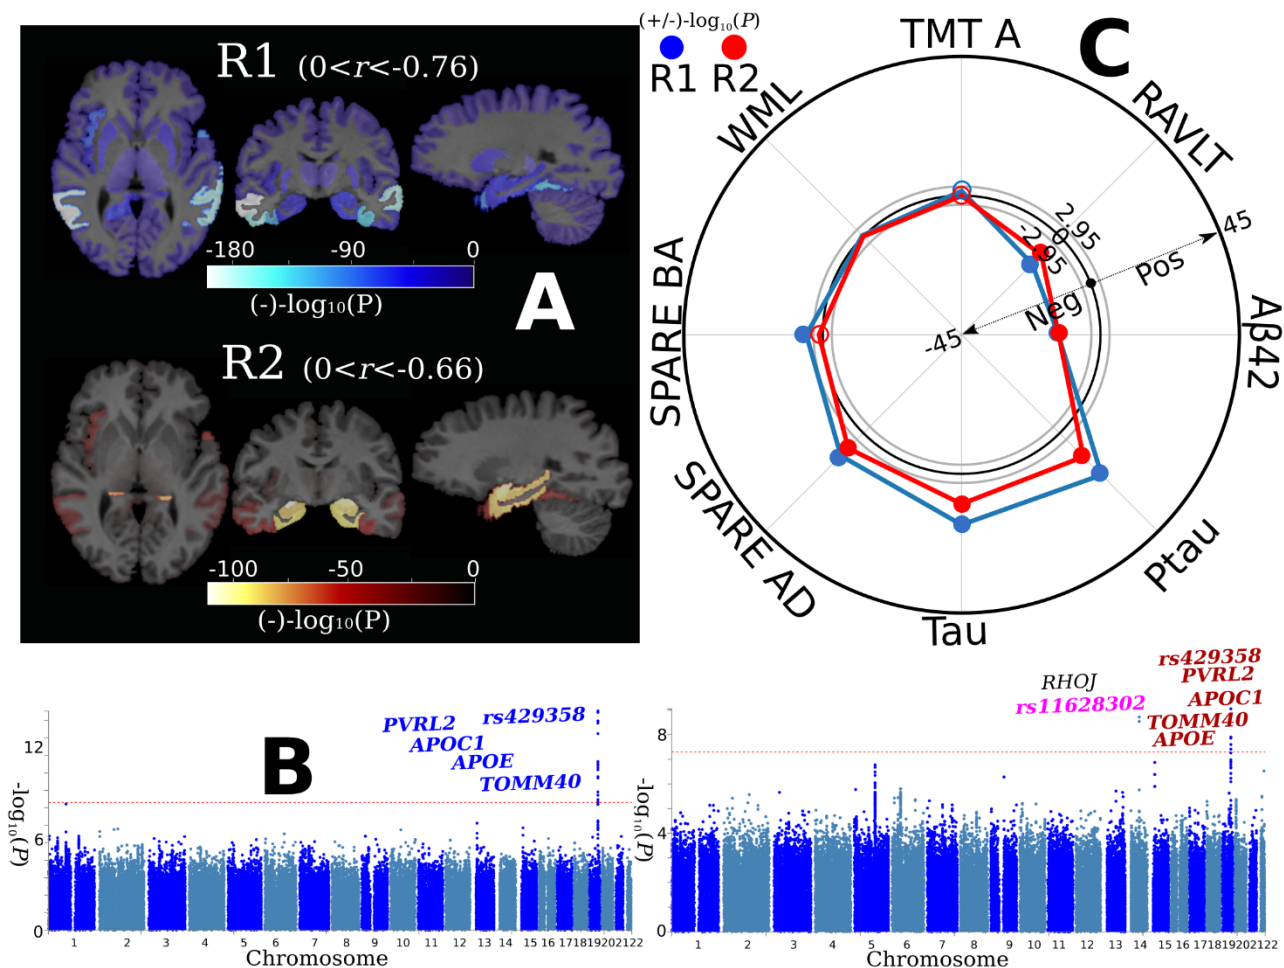

266 **A)** Longitudinal brain association studies show that the R1 dimension exhibits widespread brain  
 267 atrophy, whereas the R2 dimension displays focal medial temporal lobe atrophy. We first derived  
 268 the rate of change of the 119 GM ROIs and the R1 and R2 dimensions using a linear mixed  
 269 effect model; a linear regression model was then fit to the rate of change of the ROIs, R1, and R2  
 270 to derive the beta value of each ROI. A negative value denotes longitudinal brain atrophy with a  
 271 negative coefficient of the rate of change in the linear regression model. The range of  $r$  for each  
 272 dimension is also shown. Of note, the sample size ( $N$ ) for R1 and R2 is the same for each ROI.  
 273 **B)** Genome-wide association studies demonstrate that the R1 and R2 dimensions are both  
 274 associated with variants related to *APOE* genes (genome-wide P-value threshold with the red  
 275 line:  $-\log_{10}(P\text{-value}) > 7.30$ ). We associated each common variant with R1 and R2 using the  
 276 whole-genome sequencing data from ADNI. Gene annotations were performed via positional,  
 277 expression quantitative trait loci, and chromatin interaction mappings using FUMA.<sup>44</sup> We then  
 278 manually queried whether they were previously associated with AD-related traits in the GWAS  
 279 Catalog.<sup>43</sup> Blue and Red-colored loci/genes indicate variants associated with AD-related traits in  
 280 previous literature for R1 and R2, respectively. **C)** Clinical association studies show that the R1  
 281 and R2 dimensions are associated with SPARE-AD<sup>37</sup>, the CSF level of tau, ptau, and amyloid.  
 282  
 283

284 **eFigure 8: Distributions of the R1 and R2 dimensions of Surreal-GAN and the P1, P2, P3,**  
 285 **and P4 dimensions of Smile-GAN**

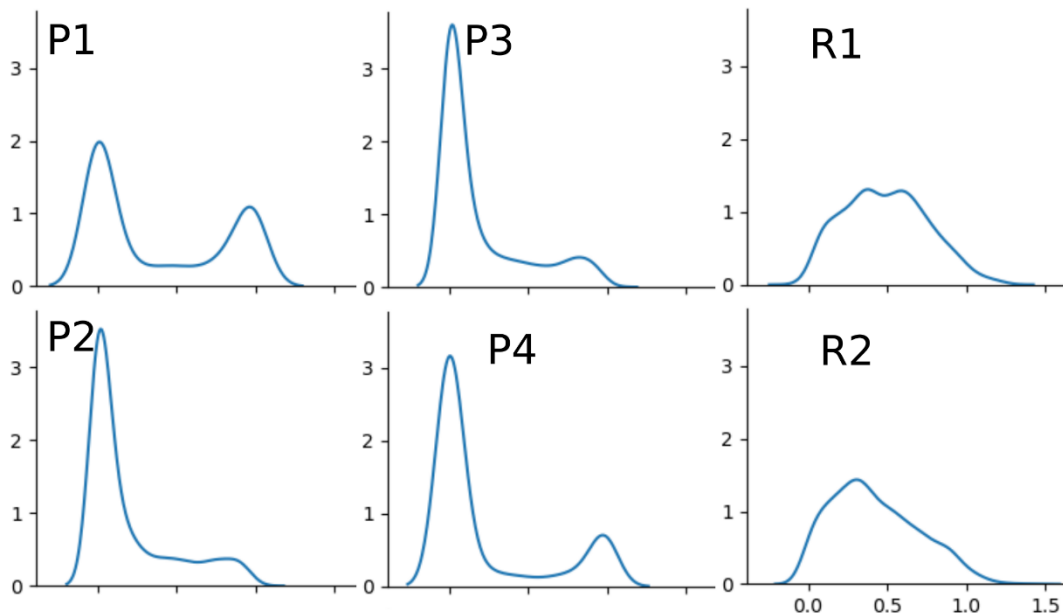

286  
 287 By modeling, Surreal-GAN's R1 and R2 dimensions are more appropriate and statistically  
 288 powerful for continuous trait-based GWAS analyses as continuous dimensional scores. In  
 289 contrast, the four subtype probability scores of Smile-GAN are better instruments for case-  
 290 control GWAS as categorical variables. We used ADNI data to show that the R1 and R2  
 291 dimension scores were approximately normally distributed, and the P1, P2, P3, and P4  
 292 dimension scores followed bimodal distributions. Of note, we performed an inverse-normal  
 293 transformation<sup>12</sup> to enable the phenotype/trait of interest to be normally distributed.



294 **eFigure 9: Best-fit model of the PRS calculation in the MCI/AD population**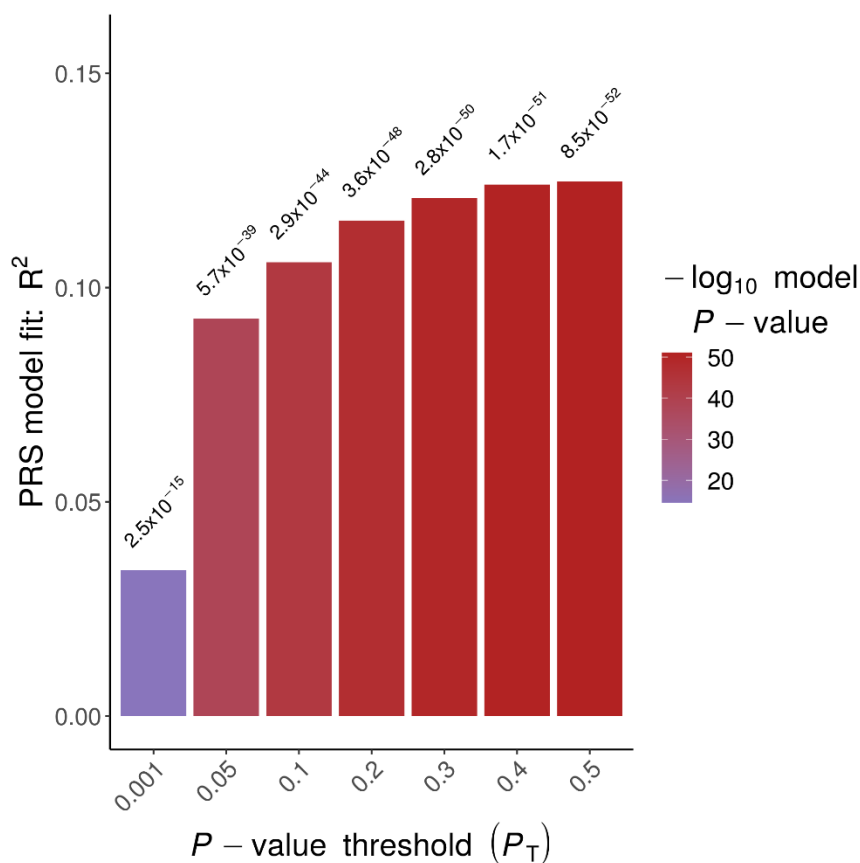

295  
 296 We adopted a classic clumping + thresholding (C+T) approach<sup>13</sup> to calculate the PRS of AD for  
 297 all participants from ADNI and UKBB (**Method 6E**). To approximate the "best-fit" PRS, we  
 298 performed a logistic regression using the PRS calculated at different  $P$ -value thresholds (0.001,  
 299 0.05, 0.1, 0.2, 0.3, 0.4, and 0.5), controlling for age, sex, and the first five genetic PCs. We chose  
 300 the  $P$ -value threshold (0.5) based on the PRS that explains the highest phenotypic variance ( $R^2$ )  
 301 (AD vs. CU in ADNI).

302 **eTable 1: Brain association studies for the MCI/AD population from ADNI and BLSA.**  
 303 Each ROI was fit with a linear regression model by controlling covariates.  $-\log_{10}(\text{P-value})$  and  
 304 Pearson's correlation ( $r$ ) are reported. For the P-values, we also added the sign of the ROI's beta  
 305 coefficient values to indicate the effect's direction. The threshold for Bonferroni corrected –  
 306  $\log_{10}(\text{P-value})$  is  $> 3.38$ . For the  $r$  values, the ROIs that did not survive the multiple comparisons  
 307 or showed a positive  $r$  (negative  $r$  means brain atrophy) are assigned a value of 0 for  
 308 visualization purposes.

| ROI                                    | R1:<br>sign $[-\log_{10}(\text{P-value})]$ | R2:<br>sign $[-\log_{10}(\text{P-value})]$ | R1:<br>$r$ | R2:<br>$r$ |
|----------------------------------------|--------------------------------------------|--------------------------------------------|------------|------------|
| Right Accumbens Area                   | -7.50571                                   | -18.5683                                   | -0.13385   | -0.22157   |
| Left Accumbens Area                    | -4.57493                                   | -16.6058                                   | -0.10096   | -0.21176   |
| Right Amygdala                         | -12.1396                                   | -281.515                                   | -0.17085   | -0.65027   |
| Left Amygdala                          | -13.421                                    | -262.174                                   | -0.17854   | -0.63577   |
| Right Caudate                          | 4.47843                                    | 0.06662                                    | 0.03963    | 0          |
| Left Caudate                           | 3.80988                                    | 0.01493                                    | 0.0358     | 0          |
| Right Cerebellum<br>Exterior           | -1.42046                                   | -1.43982                                   | 0          | 0          |
| Left Cerebellum Exterior               | -0.89444                                   | -1.43875                                   | 0          | 0          |
| Right Hippocampus                      | -7.10095                                   | -273.254                                   | -0.12845   | -0.65086   |
| Left Hippocampus                       | -4.85907                                   | -286.073                                   | -0.10114   | -0.66999   |
| Right Pallidum                         | 0.45787                                    | -0.44775                                   | 0          | 0          |
| Left Pallidum                          | 0.90213                                    | -0.62152                                   | 0          | 0          |
| Right Putamen                          | -1.32989                                   | -1.3305                                    | 0          | 0          |
| Left Putamen                           | -1.08232                                   | -0.87145                                   | 0          | 0          |
| Right Thalamus Proper                  | -5.56006                                   | -14.8387                                   | -0.1137    | -0.16236   |
| Left Thalamus Proper                   | -4.7225                                    | -11.6842                                   | -0.10534   | -0.14483   |
| Cerebellar Vermal<br>Lobules I-V       | -2.35113                                   | -0.08627                                   | 0          | 0          |
| Cerebellar Vermal<br>Lobules VI-VII    | 1.2309                                     | 0.19721                                    | 0          | 0          |
| Cerebellar Vermal<br>Lobules VIII-X    | 1.01513                                    | -1.28001                                   | 0          | 0          |
| Left Basal Forebrain                   | -3.13748                                   | -31.1551                                   | 0          | -0.30623   |
| Right Basal Forebrain                  | -0.07585                                   | -18.4305                                   | 0          | -0.24177   |
| Right ACgG anterior<br>cingulate gyrus | -2.78765                                   | -5.35387                                   | 0          | -0.12467   |
| Left ACgG anterior<br>cingulate gyrus  | -8.48968                                   | -2.56191                                   | -0.15256   | 0          |
| Right AIns anterior<br>insula          | -26.1772                                   | -16.5433                                   | -0.23749   | -0.18867   |
| Left AIns anterior insula              | -29.959                                    | -21.3573                                   | -0.25152   | -0.21728   |
| Right AOrG anterior<br>orbital gyrus   | -4.39974                                   | 0.14837                                    | -0.12046   | 0          |
| Left AOrG anterior<br>orbital gyrus    | -4.6851                                    | -0.18991                                   | -0.1193    | 0          |
| Right AnG angular<br>gyrus             | -93.8132                                   | -0.65332                                   | -0.46814   | 0          |
| Left AnG angular gyrus                 | -72.644                                    | -1.2325                                    | -0.42036   | 0          |
| Right Calc calcarine<br>cortex         | 0.13368                                    | 0.53457                                    | 0          | 0          |
| Left Calc calcarine<br>cortex          | 0.14284                                    | 1.57312                                    | 0          | 0          |
| Right CO central<br>operculum          | -40.5874                                   | -0.15535                                   | -0.28393   | 0          |
| Left CO central<br>operculum           | -53.6712                                   | -0.88026                                   | -0.32856   | 0          |
| Right Cun cuneus                       | -2.36823                                   | -0.23906                                   | 0          | 0          |
| Left Cun cuneus                        | -1.68046                                   | -0.22262                                   | 0          | 0          |

|                                                  |          |          |          |          |
|--------------------------------------------------|----------|----------|----------|----------|
| Right Ent entorhinal area                        | -11.3956 | -212.355 | -0.16588 | -0.57772 |
| Left Ent entorhinal area                         | -14.2329 | -234.601 | -0.17832 | -0.63567 |
| Right FO frontal operculum                       | -25.7413 | -0.60814 | -0.24631 | 0        |
| Left FO frontal operculum                        | -21.6485 | -1.82348 | -0.21898 | 0        |
| Right FRP frontal pole                           | -3.30212 | 1.53437  | 0        | 0        |
| Left FRP frontal pole                            | -8.63073 | -0.61843 | -0.16264 | 0        |
| Right FuG fusiform gyrus                         | -47.9404 | -26.9014 | -0.30709 | -0.21163 |
| Left FuG fusiform gyrus                          | -50.7759 | -26.4785 | -0.31803 | -0.22676 |
| Right GRe gyrus rectus                           | -2.45628 | -3.16739 | 0        | 0        |
| Left GRe gyrus rectus                            | 0.0541   | -2.01584 | 0        | 0        |
| Right IOG inferior occipital gyrus               | -22.9084 | 0.04341  | -0.24389 | 0        |
| Left IOG inferior occipital gyrus                | -28.3487 | 0.1735   | -0.26282 | 0        |
| Right ITG inferior temporal gyrus                | -128.732 | -18.3864 | -0.46735 | -0.16197 |
| Left ITG inferior temporal gyrus                 | -120.071 | -20.2061 | -0.46359 | -0.17083 |
| Right LiG lingual gyrus                          | -6.49459 | -1.78258 | -0.14713 | 0        |
| Left LiG lingual gyrus                           | -2.5011  | -0.47708 | 0        | 0        |
| Right LOrG lateral orbital gyrus                 | 0.47646  | 3.80038  | 0        | 0.08938  |
| Left LOrG lateral orbital gyrus                  | -0.16276 | 0.35955  | 0        | 0        |
| Right MCgG middle cingulate gyrus                | -4.18551 | -0.6196  | -0.12514 | 0        |
| Left MCgG middle cingulate gyrus                 | -3.06066 | -0.00227 | 0        | 0        |
| Right MFC medial frontal cortex                  | -4.06739 | -6.21943 | -0.0963  | -0.1428  |
| Left MFC medial frontal cortex                   | -0.70819 | -2.32881 | 0        | 0        |
| Right MFG middle frontal gyrus                   | -23.0666 | 6.25053  | -0.23259 | 0.09546  |
| Left MFG middle frontal gyrus                    | -28.2634 | 4.22507  | -0.25529 | 0.07449  |
| Right MOG middle occipital gyrus                 | -29.2134 | -0.6177  | -0.2844  | 0        |
| Left MOG middle occipital gyrus                  | -36.8055 | -1.00391 | -0.31201 | 0        |
| Right MORG medial orbital gyrus                  | -6.72452 | -0.67406 | -0.15059 | 0        |
| Left MORG medial orbital gyrus                   | -0.78826 | 0.0603   | 0        | 0        |
| Right MPoG postcentral gyrus medial segment      | -0.22712 | 1.52575  | 0        | 0        |
| Left MPoG postcentral gyrus medial segment       | 0.07641  | 1.87733  | 0        | 0        |
| Right MPrG precentral gyrus medial segment       | -0.12598 | 1.43652  | 0        | 0        |
| Left MPrG precentral gyrus medial segment        | -0.70782 | 4.12148  | 0        | 0.08423  |
| Right MSFG superior frontal gyrus medial segment | -11.9297 | 0.46343  | -0.17345 | 0        |
| Left MSFG superior frontal gyrus medial segment  | -13.114  | -0.31839 | -0.17525 | 0        |
| Right MTG middle temporal gyrus                  | -155.837 | -15.2718 | -0.51863 | -0.16543 |
| Left MTG middle temporal gyrus                   | -149.597 | -15.5284 | -0.5215  | -0.17027 |

|                                                          |          |          |          |          |
|----------------------------------------------------------|----------|----------|----------|----------|
| Right OCP occipital pole                                 | 4.31229  | 0.64664  | 0.036    | 0        |
| Left OCP occipital pole                                  | 0.93506  | 0.10407  | 0        | 0        |
| Right OFuG occipital fusiform gyrus                      | -8.06137 | 0.24056  | -0.15547 | 0        |
| Left OFuG occipital fusiform gyrus                       | -27.0683 | -3.09207 | -0.2645  | 0        |
| Right OpIFG opercular part of the inferior frontal gyrus | -17.399  | -0.07107 | -0.20488 | 0        |
| Left OpIFG opercular part of the inferior frontal gyrus  | -30.847  | 0.40158  | -0.26572 | 0        |
| Right OrIFG orbital part of the inferior frontal gyrus   | -5.11808 | 1.5731   | -0.11731 | 0        |
| Left OrIFG orbital part of the inferior frontal gyrus    | -3.7895  | 2.03442  | -0.09809 | 0        |
| Right PCgG posterior cingulate gyrus                     | -32.6246 | -2.30486 | -0.28065 | 0        |
| Left PCgG posterior cingulate gyrus                      | -37.6512 | -4.94491 | -0.29181 | -0.07176 |
| Right PCu precuneus                                      | -62.8395 | 0.22134  | -0.36339 | 0        |
| Left PCu precuneus                                       | -47.6593 | -0.36123 | -0.32947 | 0        |
| Right PHG parahippocampal gyrus                          | -19.1909 | -189.939 | -0.20697 | -0.5469  |
| Left PHG parahippocampal gyrus                           | -19.7229 | -208.439 | -0.20401 | -0.57164 |
| Right PIns posterior insula                              | -49.5689 | -9.65035 | -0.3065  | -0.15683 |
| Left PIns posterior insula                               | -60.8608 | -6.47558 | -0.33883 | -0.14154 |
| Right PO parietal operculum                              | -18.1403 | 0.86838  | -0.2199  | 0        |
| Left PO parietal operculum                               | -21.4814 | 0.2996   | -0.23754 | 0        |
| Right PoG postcentral gyrus                              | -16.0393 | 2.99274  | -0.2013  | 0        |
| Left PoG postcentral gyrus                               | -16.6346 | 2.15175  | -0.20579 | 0        |
| Right POrG posterior orbital gyrus                       | -0.91914 | -2.81108 | 0        | 0        |
| Left POrG posterior orbital gyrus                        | -0.14594 | -2.28165 | 0        | 0        |
| Right PP planum polare                                   | -29.4866 | -8.91216 | -0.24271 | -0.15817 |
| Left PP planum polare                                    | -16.8675 | -7.19882 | -0.18734 | -0.15264 |
| Right PrG precentral gyrus                               | -12.9721 | 9.52306  | -0.17726 | 0.1078   |
| Left PrG precentral gyrus                                | -15.5279 | 5.81795  | -0.19317 | 0.08159  |
| Right PT planum temporale                                | -23.4547 | -0.65338 | -0.23324 | 0        |
| Left PT planum temporale                                 | -28.7539 | -0.77124 | -0.26384 | 0        |
| Right SCA subcallosal area                               | -0.05839 | -3.30599 | 0        | 0        |
| Left SCA subcallosal area                                | -0.04662 | -1.18346 | 0        | 0        |
| Right SFG superior frontal gyrus                         | -20.3875 | 1.36576  | -0.22634 | 0        |
| Left SFG superior frontal gyrus                          | -21.7389 | 1.42391  | -0.23471 | 0        |
| Right SMC supplementary motor cortex                     | -3.43682 | -0.00728 | -0.09812 | 0        |
| Left SMC supplementary motor cortex                      | -1.81719 | -0.50428 | 0        | 0        |

|                                                                 |          |          |          |          |
|-----------------------------------------------------------------|----------|----------|----------|----------|
| Right SMG<br>supramarginal gyrus                                | -89.0207 | -0.09531 | -0.45635 | 0        |
| Left SMG<br>supramarginal gyrus                                 | -93.6886 | 1.18687  | -0.47475 | 0        |
| Right SOG superior<br>occipital gyrus                           | -13.1905 | 0.37282  | -0.18002 | 0        |
| Left SOG superior<br>occipital gyrus                            | -7.89322 | 0.20519  | -0.13827 | 0        |
| Right SPL superior<br>parietal lobule                           | -35.647  | 0.72415  | -0.29015 | 0        |
| Left SPL superior<br>parietal lobule                            | -36.7243 | 1.40962  | -0.2972  | 0        |
| Right STG superior<br>temporal gyrus                            | -50.1012 | -4.34522 | -0.33617 | -0.10192 |
| Left STG superior<br>temporal gyrus                             | -58.679  | -6.32759 | -0.36681 | -0.12603 |
| Right TMP temporal<br>pole                                      | -42.0432 | -87.8416 | -0.30518 | -0.40385 |
| Left TMP temporal pole                                          | -44.3756 | -74.3941 | -0.31169 | -0.38748 |
| Right TrIFG triangular<br>part of the inferior frontal<br>gyrus | -0.63125 | -0.26408 | 0        | 0        |
| Left TrIFG triangular<br>part of the inferior frontal<br>gyrus  | -4.62617 | 0.29648  | -0.11686 | 0        |
| Right TTG transverse<br>temporal gyrus                          | -1.92176 | -0.36857 | 0        | 0        |
| Left TTG transverse<br>temporal gyrus                           | -4.67912 | -0.00132 | -0.11116 | 0        |

310 **eTable 2: Identified genomic loci and mapped genes for baseline GWAS in the MCI/AD**  
311 **population**

| Locus (lead SNP) | $-\log_{10}(\text{P-value})$ | Chromosome | Mapped genes                      |
|------------------|------------------------------|------------|-----------------------------------|
| rs429358         | 10.98                        | 19         | <i>APOE, PVRL2, APOC1, TOMM40</i> |

312

313

314 **eTable 3: Clinical association studies for the MCI/AD population from ADNI and BLSA.**  
 315 Each clinical variable/biomarker was fit with a linear regression model by controlling covariates.  
 316  $-\log_{10}(\text{P-value})$  and the coefficient of each variable/biomarker (beta) are reported. For the P-  
 317 values, we added the sign of the variable's beta coefficient values to indicate the effect's  
 318 direction. The threshold for Bonferroni corrected  $-\log_{10}(\text{P-value})$  is  $> 2.95$ . For the beta values,  
 319 the ROIs that did not survive the multiple comparisons are assigned a value of 0.

| Variable                | R1:<br>sign[-log <sub>10</sub> (P-value)] | R2:<br>sign[-log <sub>10</sub> (P-value)] | R1:<br>beta | R2:<br>beta |
|-------------------------|-------------------------------------------|-------------------------------------------|-------------|-------------|
| FAQ_Total               | 27.553                                    | 28.8057                                   | 0.0115      | 0.01237     |
| CDR_Global              | 19.4197                                   | 14.7913                                   | 0.3215      | 0.29347     |
| CDR_SOB                 | 25.1713                                   | 25.8645                                   | 0.04496     | 0.04693     |
| NPIQ_Total              | 1.98106                                   | 0.82936                                   | 0           | 0           |
| DSST                    | -9.43994                                  | -0.04787                                  | -0.00837    | 0           |
| TMT_A                   | 41.8293                                   | 0.27449                                   | 0.00347     | 0           |
| TMT_B                   | 43.8428                                   | 2.95569                                   | 0.00122     | 0.00032     |
| MMSE                    | -27.793                                   | -29.9245                                  | -0.03047    | -0.03249    |
| Digit_Span_Backward     | -5.19651                                  | -0.29222                                  | -0.02402    | 0           |
| Digit_Span_Forward      | -1.232                                    | -0.87773                                  | 0           | 0           |
| MOCA                    | -19.1169                                  | -12.0298                                  | -0.02151    | -0.01697    |
| BNT                     | -14.9887                                  | -16.0565                                  | -0.01339    | -0.01414    |
| RAVLT                   | -24.1567                                  | -38.206                                   | -0.00431    | -0.00567    |
| RAVLT_IM                | -27.8745                                  | -30.1843                                  | -0.00725    | -0.00792    |
| RAVLT_Short             | -13.0604                                  | -38.1494                                  | -0.01483    | -0.02665    |
| RAVLT_Long              | -13.2972                                  | -37.6006                                  | -0.01412    | -0.02501    |
| LM_DEL_A                | -21.6429                                  | -60.621                                   | -0.01749    | -0.03036    |
| LM_IM_A                 | -28.0603                                  | -31.5233                                  | -0.01911    | -0.0213     |
| ANI_Fluency             | -27.8458                                  | -10.4616                                  | -0.01424    | -0.00907    |
| VEG_Fluency             | -12.1705                                  | -4.17084                                  | -0.02157    | -0.01279    |
| TS_RATIO                | 0.08455                                   | 0.82137                                   | 0           | 0           |
| TS_RATIO_ADJ            | 0.09716                                   | 0.64491                                   | 0           | 0           |
| BNT_percent             | -14.9887                                  | -16.0565                                  | -0.00402    | -0.00424    |
| Cholesterol             | 0.10488                                   | 0.30897                                   | 0           | 0           |
| Diastole                | 0.53221                                   | -0.23115                                  | 0           | 0           |
| Glucose                 | 0.02649                                   | -0.56589                                  | 0           | 0           |
| Systole                 | 4.03676                                   | -0.40777                                  | 0.00155     | 0           |
| Triglycerides           | -0.70672                                  | 0.10056                                   | 0           | 0           |
| ABETA42_ADNI            | -16.6712                                  | -9.64753                                  | -0.00018    | -0.00014    |
| PTAU                    | 5.69056                                   | 6.12353                                   | 0.00286     | 0.00299     |
| TAU                     | 4.7303                                    | 7.25391                                   | 0.00029     | 0.00036     |
| Diabetes                | -0.00052                                  | 1.41286                                   | 0           | 0           |
| Hypertension            | 2.00269                                   | 0.027                                     | 0           | 0           |
| Diagnosis_Depression    | -0.44864                                  | 0.047                                     | 0           | 0           |
| Alcoholic               | 0.89498                                   | 0.32819                                   | 0           | 0           |
| Family_History_Dementia | -1.84702                                  | -0.25455                                  | 0           | 0           |
| Ethnicity               | 0.80007                                   | 0.04149                                   | 0           | 0           |
| Height                  | -0.57955                                  | 0.70593                                   | 0           | 0           |
| BMI                     | -0.97997                                  | -7.32202                                  | 0           | -0.00838    |
| Weight                  | -1.57751                                  | -5.66086                                  | 0           | -0.0026     |
| SPARE_AD                | 109.59                                    | 201.144                                   | 0.11401     | 0.1527      |
| SPARE_BA                | 54.6991                                   | 8.33545                                   | 0.0116      | 0.00471     |
| AV45_PET_ADNI           | 8.33865                                   | 4.19236                                   | 0.20317     | 0.13769     |
| FDG                     | -52.5638                                  | -10.3312                                  | -0.82696    | -0.37305    |
| WMLS_Volume_701         | 6.1794                                    | 1.29141                                   | 0.02575     | 0           |

321 **eTable 4: Brain association studies for the general population from UKBB.** Each ROI was  
 322 fit with a linear regression model by controlling covariates.  $-\log_{10}(\text{P-value})$  and Pearson's  
 323 correlation ( $r$ ) are reported. For the P-values, we also added the sign of the ROI's beta coefficient  
 324 values to indicate the effect's direction. The threshold for Bonferroni corrected  $-\log_{10}(\text{P-value})$   
 325 is  $> 3.38$ . For the  $r$  values, the ROIs that did not survive the multiple comparisons or showed a  
 326 positive  $r$  (negative  $r$  means brain atrophy) are assigned a value of 0 for visualization purposes.

| ROI                                    | R1:<br>sign $[-\log_{10}(\text{P-value})]$ | R2:<br>sign $[-\log_{10}(\text{P-value})]$ | R1:<br>$r$ | R2:<br>$r$ |
|----------------------------------------|--------------------------------------------|--------------------------------------------|------------|------------|
| Right Accumbens Area                   | 1.41659                                    | -182.266                                   | 0          | -0.0492    |
| Left Accumbens Area                    | 1.61428                                    | -167.936                                   | 0          | -0.03835   |
| Right Amygdala                         | -98.726                                    | -330                                       | -0.15118   | -0.33719   |
| Left Amygdala                          | -56.4488                                   | -330                                       | -0.12555   | -0.31386   |
| Right Caudate                          | 300                                        | -44.3821                                   | 0.11226    | -0.02326   |
| Left Caudate                           | 300                                        | -37.3245                                   | 0.10616    | -0.00926   |
| Right Cerebellum<br>Exterior           | -9.33216                                   | -151.136                                   | -0.08723   | 0.00104    |
| Left Cerebellum Exterior               | -12.3741                                   | -116.615                                   | -0.09151   | 0.0084     |
| Right Hippocampus                      | 0.12934                                    | -330                                       | 0          | -0.36498   |
| Left Hippocampus                       | 1.61488                                    | -330                                       | 0          | -0.34206   |
| Right Pallidum                         | 22.3496                                    | -27.02                                     | -0.038     | 0.0343     |
| Left Pallidum                          | 21.293                                     | -47.475                                    | -0.02817   | 0.01584    |
| Right Putamen                          | -0.82029                                   | -69.6543                                   | 0          | 0.00366    |
| Left Putamen                           | -0.3018                                    | -59.1727                                   | 0          | 0.00934    |
| Right Thalamus Proper                  | -28.9526                                   | -87.2289                                   | -0.12938   | 0.04023    |
| Left Thalamus Proper                   | -33.4427                                   | -92.0801                                   | -0.13339   | 0.04002    |
| Cerebellar Vermal<br>Lobules I-V       | -29.5876                                   | -7.76566                                   | -0.10368   | 0.03997    |
| Cerebellar Vermal<br>Lobules VI-VII    | 0.80143                                    | -21.3033                                   | 0          | -0.00421   |
| Cerebellar Vermal<br>Lobules VIII-X    | -3.851                                     | -87.7558                                   | -0.05945   | -0.02211   |
| Left Basal Forebrain                   | 137.211                                    | -64.3165                                   | 0.06201    | -0.03614   |
| Right Basal Forebrain                  | 104.834                                    | -110.189                                   | 0.04623    | -0.05927   |
| Right ACgG anterior<br>cingulate gyrus | -0.21265                                   | -5.72052                                   | 0          | 0.03231    |
| Left ACgG anterior<br>cingulate gyrus  | -10.4907                                   | -5.89634                                   | -0.1117    | 0.04079    |
| Right AIns anterior<br>insula          | -90.4988                                   | -112.325                                   | -0.15479   | -0.00513   |
| Left AIns anterior insula              | -87.4626                                   | -84.7404                                   | -0.15327   | 0.00519    |
| Right AOrG anterior<br>orbital gyrus   | -3.62996                                   | 142.979                                    | -0.08145   | 0.17176    |
| Left AOrG anterior<br>orbital gyrus    | -5.75963                                   | 70.2007                                    | -0.06233   | 0.13786    |
| Right AnG angular<br>gyrus             | -300                                       | 13.7095                                    | -0.37557   | 0.10415    |
| Left AnG angular gyrus                 | -300                                       | 32.058                                     | -0.3504    | 0.11536    |
| Right Calc calcarine<br>cortex         | 14.0495                                    | 84.0712                                    | -0.02481   | 0.14709    |
| Left Calc calcarine<br>cortex          | 22.6608                                    | 92.9419                                    | -0.00831   | 0.14631    |
| Right CO central<br>operculum          | -300                                       | 66.8329                                    | -0.25532   | 0.14862    |
| Left CO central<br>operculum           | -300                                       | 15.5315                                    | -0.28549   | 0.11619    |
| Right Cun cuneus                       | -1.40722                                   | 25.3579                                    | 0          | 0.11906    |
| Left Cun cuneus                        | 0.01067                                    | 35.5432                                    | 0          | 0.12482    |
| Right Ent entorhinal<br>area           | -15.7387                                   | -330                                       | -0.07315   | -0.33158   |
| Left Ent entorhinal area               | -37.3154                                   | -330                                       | -0.09629   | -0.38061   |



|                                                  |          |          |          |         |
|--------------------------------------------------|----------|----------|----------|---------|
| Right FO frontal operculum                       | -283.5   | 2.60188  | -0.20745 | 0       |
| Left FO frontal operculum                        | -174.006 | 67.8112  | -0.18019 | 0.14426 |
| Right FRP frontal pole                           | -12.934  | 178.43   | -0.11962 | 0.1829  |
| Left FRP frontal pole                            | -43.9357 | 73.5255  | -0.13305 | 0.1402  |
| Right FuG fusiform gyrus                         | -198.547 | -36.8795 | -0.17519 | 0.03427 |
| Left FuG fusiform gyrus                          | -300     | -18.9938 | -0.21721 | 0.04813 |
| Right GRe gyrus rectus                           | -3.66473 | 9.10609  | -0.08331 | 0.09133 |
| Left GRe gyrus rectus                            | 0.7205   | 15.698   | 0        | 0.09976 |
| Right IOG inferior occipital gyrus               | -15.7166 | 5.87919  | -0.10042 | 0.08228 |
| Left IOG inferior occipital gyrus                | -7.20403 | 113.876  | -0.10013 | 0.14714 |
| Right ITG inferior temporal gyrus                | -300     | 0.85369  | -0.32453 | 0       |
| Left ITG inferior temporal gyrus                 | -300     | 15.0401  | -0.3341  | 0.104   |
| Right LiG lingual gyrus                          | -53.927  | -20.8439 | -0.13147 | 0.04954 |
| Left LiG lingual gyrus                           | -6.76542 | 26.077   | -0.10231 | 0.11848 |
| Right LOrG lateral orbital gyrus                 | 18.2409  | 132.453  | -0.0165  | 0.1532  |
| Left LOrG lateral orbital gyrus                  | 36.4951  | 210.898  | -0.00863 | 0.19322 |
| Right MCgG middle cingulate gyrus                | -3.90798 | 25.1491  | -0.09126 | 0.10476 |
| Left MCgG middle cingulate gyrus                 | -8.4155  | 15.4716  | -0.0963  | 0.09492 |
| Right MFC medial frontal cortex                  | 1.78702  | -3.97811 | 0        | 0.04703 |
| Left MFC medial frontal cortex                   | 21.2943  | 2.90145  | -0.02022 | 0       |
| Right MFG middle frontal gyrus                   | -129.233 | 279.61   | -0.17922 | 0.21173 |
| Left MFG middle frontal gyrus                    | -109.494 | 330      | -0.17173 | 0.22885 |
| Right MOG middle occipital gyrus                 | -149.532 | 88.1747  | -0.1873  | 0.14692 |
| Left MOG middle occipital gyrus                  | -300     | 18.7585  | -0.26727 | 0.10437 |
| Right MORG medial orbital gyrus                  | 15.4308  | 9.37965  | -0.06111 | 0.09879 |
| Left MORG medial orbital gyrus                   | 106.518  | 15.6631  | 0.00145  | 0.0948  |
| Right MPoG postcentral gyrus medial segment      | 18.4511  | 106.131  | -0.00525 | 0.14145 |
| Left MPoG postcentral gyrus medial segment       | 0.94506  | 79.6395  | 0        | 0.13066 |
| Right MPrG precentral gyrus medial segment       | 18.3772  | 193.817  | -0.01673 | 0.19332 |
| Left MPrG precentral gyrus medial segment        | 69.2107  | 147.742  | 0.03316  | 0.16704 |
| Right MSFG superior frontal gyrus medial segment | -76.67   | 244.578  | -0.15288 | 0.20867 |
| Left MSFG superior frontal gyrus medial segment  | -91.3879 | 168.41   | -0.15268 | 0.19107 |
| Right MTG middle temporal gyrus                  | -300     | -20.9451 | -0.37466 | 0.05852 |
| Left MTG middle temporal gyrus                   | -300     | -21.69   | -0.39366 | 0.0523  |
| Right OCP occipital pole                         | 197.625  | 84.9317  | 0.0602   | 0.13398 |
| Left OCP occipital pole                          | 255.843  | 211.639  | 0.06741  | 0.1804  |

|                                                          |          |          |          |          |
|----------------------------------------------------------|----------|----------|----------|----------|
| Right OFuG occipital fusiform gyrus                      | -12.0126 | 94.2742  | -0.0894  | 0.14724  |
| Left OFuG occipital fusiform gyrus                       | -101.671 | -3.81391 | -0.14763 | 0.05335  |
| Right OpIFG opercular part of the inferior frontal gyrus | -273.101 | 91.9958  | -0.20386 | 0.15424  |
| Left OpIFG opercular part of the inferior frontal gyrus  | -243.767 | 180.399  | -0.20055 | 0.19079  |
| Right OrIFG orbital part of the inferior frontal gyrus   | -2.27412 | 22.8358  | 0        | 0.09156  |
| Left OrIFG orbital part of the inferior frontal gyrus    | -0.24746 | 58.0824  | 0        | 0.12043  |
| Right PCgG posterior cingulate gyrus                     | -209.592 | -11.9412 | -0.19378 | 0.0483   |
| Left PCgG posterior cingulate gyrus                      | -262.46  | -34.3738 | -0.20553 | 0.03161  |
| Right PCu precuneus                                      | -300     | 54.9645  | -0.29166 | 0.14355  |
| Left PCu precuneus                                       | -300     | 40.902   | -0.27177 | 0.13637  |
| Right PHG parahippocampal gyrus                          | -173.097 | -330     | -0.16496 | -0.34984 |
| Left PHG parahippocampal gyrus                           | -198.601 | -330     | -0.17802 | -0.37505 |
| Right PIns posterior insula                              | -266.472 | -23.7998 | -0.21771 | 0.04153  |
| Left PIns posterior insula                               | -300     | -89.6578 | -0.23383 | -0.00766 |
| Right PO parietal operculum                              | -66.7351 | 66.8369  | -0.14711 | 0.13074  |
| Left PO parietal operculum                               | -102.229 | 85.3908  | -0.1649  | 0.15125  |
| Right PoG postcentral gyrus                              | -282.817 | 120.309  | -0.2271  | 0.16294  |
| Left PoG postcentral gyrus                               | -270.006 | 78.0722  | -0.22169 | 0.14354  |
| Right POrG posterior orbital gyrus                       | 78.6402  | 1.4835   | 0.00852  | 0        |
| Left POrG posterior orbital gyrus                        | 45.1416  | 1.80514  | -0.00667 | 0        |
| Right PP planum polare                                   | -71.6443 | -43.1669 | -0.14793 | 0.00847  |
| Left PP planum polare                                    | -34.4771 | -11.488  | -0.12538 | 0.03474  |
| Right PrG precentral gyrus                               | -46.192  | 330      | -0.13865 | 0.2993   |
| Left PrG precentral gyrus                                | -45.3155 | 330      | -0.13484 | 0.28293  |
| Right PT planum temporale                                | -120.698 | 115.443  | -0.16067 | 0.16964  |
| Left PT planum temporale                                 | -273.535 | 9.16214  | -0.20004 | 0.10329  |
| Right SCA subcallosal area                               | 65.4707  | -8.55722 | -0.00285 | 0.02647  |
| Left SCA subcallosal area                                | 71.5098  | -12.2986 | 0.00515  | 0.0165   |
| Right SFG superior frontal gyrus                         | -36.5317 | 274.089  | -0.13275 | 0.21365  |
| Left SFG superior frontal gyrus                          | -53.0535 | 189.783  | -0.13843 | 0.19185  |
| Right SMC supplementary motor cortex                     | -0.03372 | 9.90833  | 0        | 0.09648  |
| Left SMC supplementary motor cortex                      | 2.78577  | 46.7257  | 0        | 0.13199  |
| Right SMG supramarginal gyrus                            | -300     | 48.1282  | -0.3503  | 0.12322  |

|                                                                 |          |          |          |          |
|-----------------------------------------------------------------|----------|----------|----------|----------|
| Left SMG<br>supramarginal gyrus                                 | -300     | 27.7533  | -0.39415 | 0.11116  |
| Right SOG superior<br>occipital gyrus                           | -47.779  | 51.9886  | -0.1022  | 0.12563  |
| Left SOG superior<br>occipital gyrus                            | -20.1313 | 186.27   | -0.08898 | 0.18213  |
| Right SPL superior<br>parietal lobule                           | -283.018 | 19.7144  | -0.21697 | 0.10935  |
| Left SPL superior<br>parietal lobule                            | -228.822 | 42.5037  | -0.20604 | 0.12639  |
| Right STG superior<br>temporal gyrus                            | -285.959 | 59.4549  | -0.22136 | 0.14333  |
| Left STG superior<br>temporal gyrus                             | -232.898 | 45.5607  | -0.20047 | 0.13356  |
| Right TMP temporal<br>pole                                      | -300     | -330     | -0.2528  | -0.08413 |
| Left TMP temporal pole                                          | -300     | -263.576 | -0.24616 | -0.05492 |
| Right TrIFG triangular<br>part of the inferior frontal<br>gyrus | 6.09269  | 7.36744  | -0.02755 | 0.08494  |
| Left TrIFG triangular<br>part of the inferior frontal<br>gyrus  | 0.42304  | 21.9329  | 0        | 0.10336  |
| Right TTG transverse<br>temporal gyrus                          | -5.83701 | 11.5266  | -0.08222 | 0.09567  |
| Left TTG transverse<br>temporal gyrus                           | 0.38757  | 1.90911  | 0        | 0        |

328 **eTable 5: Clinical association studies for the general population from UKBB.** Each clinical  
 329 variable/biomarker was fit with a linear regression model by controlling covariates.  $-\log_{10}(\text{P-}$   
 330  $\text{value})$  and the coefficient of each variable/biomarker (beta) are reported. For the P-values, we  
 331 added the sign of the variable's beta coefficient values to indicate the effect's direction. The  
 332 threshold for Bonferroni corrected  $-\log_{10}(\text{P-value})$  is  $> 3.08$ . For the beta values, the ROIs that  
 333 did not survive the multiple comparisons are assigned a value of 0.

| Variable                               | R1:<br>sign $[-\log_{10}(\text{P-value})]$ | R2:<br>sign $[-\log_{10}(\text{P-value})]$ | R1:<br>beta | R2:<br>beta |
|----------------------------------------|--------------------------------------------|--------------------------------------------|-------------|-------------|
| Cholesterol                            | -1.24939                                   | -0.38153                                   | 0           | 0           |
| Lipoprotein A                          | -0.53029                                   | 0.04826                                    | 0           | 0           |
| HDL cholesterol                        | -3.9835                                    | -1.84715                                   | -0.01293    | 0           |
| Triglycerides                          | 13.1313                                    | 0.0063                                     | 0.00866     | 0           |
| Apolipoprotein A                       | -0.80123                                   | -1.81085                                   | 0           | 0           |
| Apolipoprotein B                       | -0.20008                                   | 0.1776                                     | 0           | 0           |
| C-reactive protein                     | 3.58939                                    | 0.14067                                    | 0.0011      | 0           |
| LDL direct                             | -1.6734                                    | -0.00117                                   | 0           | 0           |
| Glucose                                | 7.08853                                    | -0.86482                                   | 0.00632     | 0           |
| Glycated haemoglobin<br>(HbA1c)        | 14.2612                                    | -1.67051                                   | 0.00169     | 0           |
| Maternal smoking                       | 0.78205                                    | -0.77154                                   | 0           | 0           |
| Household income                       | 0.07764                                    | 2.15911                                    | 0           | 0           |
| Education                              | 3.18428                                    | 2.89039                                    | 0.00211     | 0           |
| Ethnicity                              | 0.63381                                    | 0.29638                                    | 0           | 0           |
| Townsend Deprivation<br>Index tertiles | 2.92812                                    | 1.18548                                    | 0           | 0           |
| Sleep duration                         | 0.70548                                    | 0.29459                                    | 0           | 0           |
| Easy to get up in the<br>morning       | -1.88294                                   | 3.93415                                    | 0           | 0.00199     |
| Morning or evening<br>person           | 1.17031                                    | -1.66819                                   | 0           | 0           |
| Nap during the day                     | 0.66029                                    | -0.6407                                    | 0           | 0           |
| Insomnia                               | -0.05737                                   | -2.81902                                   | 0           | 0           |
| Snoring                                | 0.05859                                    | -0.11376                                   | 0           | 0           |
| Daytime dozing sleeping                | -0.5191                                    | 0.15494                                    | 0           | 0           |
| Sleep too much                         | 2.24252                                    | 0.2305                                     | 0           | 0           |
| Sleep trouble start                    | -0.14304                                   | -0.0328                                    | 0           | 0           |
| Sleep trouble end                      | -2.39029                                   | -0.09417                                   | 0           | 0           |
| Sleep any problem                      | 0.55325                                    | -0.31399                                   | 0           | 0           |
| Ever smoked                            | -0.18363                                   | -0.28497                                   | 0           | 0           |
| Smoking status                         | 0.74339                                    | -0.20541                                   | 0           | 0           |
| Current tobacco smoking                | 2.64765                                    | 0.10738                                    | 0           | 0           |
| Past tobacco smoking                   | 1.72746                                    | -0.26343                                   | 0           | 0           |

|                                               |          |          |          |          |
|-----------------------------------------------|----------|----------|----------|----------|
| Light smokers at least 100 smokes in lifetime | -0.66022 | 1.70368  | 0        | 0        |
| Age started smoking in former smokers         | -1.40981 | 0.05561  | 0        | 0        |
| Age stopped smoking                           | 9.72342  | -0.73592 | 0.00116  | 0        |
| Smoking smokers in household                  | 0.30144  | 0.29766  | 0        | 0        |
| Exposure to tobacco smoke at home             | 0.20145  | -0.10873 | 0        | 0        |
| Exposure to tobacco smoke outside home        | -0.09736 | 0.22288  | 0        | 0        |
| Coffee intake                                 | -0.60155 | -2.47628 | 0        | 0        |
| Ever vascular heart problem diagnosed         | -5.01173 | -0.09841 | -0.01375 | 0        |
| Age high blood pressure diagnosed             | -1.32468 | -0.7335  | 0        | 0        |
| Diabetes diagnosed by doctor                  | 21.3642  | -2.04208 | 0.02258  | 0        |
| Diastolic blood pressure (automated reading)  | 10.5304  | 1.43241  | 0.00074  | 0        |
| Pulse rate (automated reading)                | 1.26898  | 0.13024  | 0        | 0        |
| Systolic blood pressure (automated reading)   | 1.83095  | 0.16135  | 0        | 0        |
| Pair matching_1                               | 6.51554  | 0.63956  | 0.0065   | 0        |
| Pair matching_2                               | 7.76305  | 1.38813  | 7.64E-05 | 0        |
| Reaction time_1                               | 2.32465  | 5.09847  | 0        | 4.21E-05 |
| Reaction time_2                               | 0.43728  | 0.68777  | 0        | 0        |
| VNR                                           | -17.0222 | -0.78106 | -0.00452 | 0        |
| Prospective memory_1                          | 1.46794  | -0.65534 | 0        | 0        |
| Prospective memory_2                          | 2.34823  | 8.31264  | 0        | 0.01136  |
| Pair_matching_2 (online)                      | 0.9509   | 0.25269  | 0        | 0        |
| Pair_matching_3 (online)                      | 0.7003   | 0.92109  | 0        | 0        |
| Symbolic digital substitution_1 (online)      | -7.16303 | -0.63596 | -0.0017  | 0        |
| Symbolic digital substitution_2 (online)      | 2.12657  | 3.19173  | 0        | 6.92E-07 |
| VNR (online)                                  | -7.91013 | -1.46754 | -0.00399 | 0        |
| TMT-A                                         | 3.02215  | -0.08899 | 0        | 0        |
| TMT-B                                         | 8.47316  | -2.29301 | 2.91E-05 | 0        |
| AD_by_proxy                                   | -2.24382 | 0.12213  | 0        | 0        |
| SPARE_AD                                      | 136      | 250      | 0.12096  | 0.1268   |
| SPARE_BA                                      | 236.859  | -46.3563 | 0.00646  | -0.00263 |
| WMLS_Volume_701                               | 120.241  | 2.06141  | 6.89E-06 | 0        |

335 **eTable 6: Identified genomic loci and mapped genes for GWAS in the general population**336 **R1:**

| Locus                 | P-value            | Chromosome | Mapped genes                                                                                                                     |
|-----------------------|--------------------|------------|----------------------------------------------------------------------------------------------------------------------------------|
| rs13079098            | 4.91E-09           | 3          | <i>MAP4, PTPN23, KIF9, COL7A1, CSPG5, KLHL18, SCAP, DHX30, NBEAL2, CCDC12, ELP6, CDC25A, ZNF589, NME6, SMARCC1, SETD2, TREX1</i> |
| rs17669337            | 4.51E-11           | 5          | --                                                                                                                               |
| rs2028849             | 8.76E-10           | 8          | <i>ENPP2</i>                                                                                                                     |
| rs11794318            | 3.02E-09           | 9          | <i>ASTN2</i>                                                                                                                     |
| rs3825045             | 1.98E-08           | 11         | <i>ZBTB16, NNMT</i>                                                                                                              |
| rs9795600             | 1.12E-08           | 12         | <i>ANAPC5, KDM2B, MORN3, RNF34</i>                                                                                               |
| rs11158204, rs5809016 | 1.31E-15, 1.30E-15 | 14         | <i>GPR135, TOMM20L, AL132989.1, C14orf37, L3HYPDH, ACTR10, TIMM9, KIAA0586, DAAM1, ARID4A, PSMA3</i>                             |
| rs34395183            | 3.70E-08           | 17         | <i>RHOT1</i>                                                                                                                     |
| rs68175985            | 2.11E-08           | 19         | <i>NFIX</i>                                                                                                                      |
| rs201662360           | 2.41E-09           | 20         | <i>MYH7B, EDEM2, TRPC4AP, UQCC1, MAP1LC3A, GDF5, ERGIC3, FAM83C, ACSS2, GDF5OS, CPNE1</i>                                        |

337

338 **R2:**

| Locus                              | P-value                      | Chromosome | Mapped genes                                                                              |
|------------------------------------|------------------------------|------------|-------------------------------------------------------------------------------------------|
| rs76606504                         | 4.48E-08                     | 1          | <i>EPS15, CDKN2C, DMRTA2, FAF1</i>                                                        |
| rs3860446, rs10184573              | 3.02E-09, 2.09E-08           | 2          | --                                                                                        |
| rs309587                           | 4.06E-09                     | 5          | <i>VCAN</i>                                                                               |
| rs117892760                        | 1.68E-17                     | 6          | <i>CENPW, HINT3, NCOA7, TRMT11</i>                                                        |
| rs55885771                         | 1.88E-08                     | 7          | <i>CAV2, TES</i>                                                                          |
| rs1475536, rs2416560               | 3.82E-13, 2.16E-08           | 9          | <i>GADD45G</i>                                                                            |
| rs58163343                         | 2.10E-08                     | 11         | <i>MDK, AMBRA1, DGKZ, CREB3L1, ARHGAP1, ATG13, CHST1, HARB11</i>                          |
| rs10774183, rs17178006, rs77956314 | 9.22E-20, 5.30E-29, 9.98E-29 | 12         | <i>TESC, RFC5, HRK, RNFT2, WIF1, MSRB3, LEMD3, FBXW8</i>                                  |
| rs143383                           | 5.46E-11                     | 20         | <i>CPNE1, GDF5OS, ACSS2, GDF5, ERGIC3, ERGIC3, MAP1LC3A, UQCC1, TRPC4AP, EDEM2, MYH7B</i> |

339 **eTable 7: Gene set enrichment analysis results in the general population**340 **R1:**

| Category                             | Gene Set                                                                     | P-value  | Overlapped genes                                                              |
|--------------------------------------|------------------------------------------------------------------------------|----------|-------------------------------------------------------------------------------|
| GWAS Catalog                         | Waist-to-hip ratio                                                           | 2.23E-11 | <i>ACSS2:MYH7B:TRPC4AP:EDEM2:<br/>FAM83C:UQCC1:GDF5:ERGIC3:CPNE1</i>          |
| GWAS Catalog                         | Huntington's disease                                                         | 5.63E-09 | <i>CCDC12:NBEAL2:SETD2:KIF9:KLHL18</i>                                        |
| GWAS Catalog                         | Prothrombin time                                                             | 8.07E-07 | <i>MYH7B:TRPC4AP:EDEM2</i>                                                    |
| GWAS Catalog                         | QRS                                                                          | 4.87E-05 | <i>MYH7B:EDEM2</i>                                                            |
| GWAS Catalog                         | Spine bone                                                                   | 7.82E-05 | <i>UQCC1:GDF5</i>                                                             |
| GWAS Catalog                         | Height                                                                       | 1.79E-04 | <i>FAM83C:UQCC1:GDF5OS:GDF5:ERGIC3:<br/>CPNE1:ENPP2</i>                       |
| GWAS Catalog                         | Blood protein                                                                | 1.99E-04 | <i>MYH7B:TRPC4AP:EDEM2:UQCC1:GDF5OS:<br/>GDF5:CPNE1:CDC25A:ZNF589:COL7A1</i>  |
| Chemical and Genetic<br>perturbation | NIKOLSKY<br>BREAST CANCER<br>20Q11 AMPLICON                                  | 2.84E-22 | <i>MAP1LC3A:ACSS2:MYH7B:TRPC4AP:<br/>EDEM2:FAM83C:UQCC1:GDF5:ERGIC3:CPNE1</i> |
| Chemical and Genetic<br>perturbation | LASTOWSKA<br>NEUROBLASTOMA<br>COPY NUMBER DN                                 | 9.36E-07 | <i>CCDC12:SETD2:SCAP:ELP6:SMARCC1:<br/>DHX30:CDC25A:ZNF589:NME6</i>           |
| Chemical and Genetic<br>perturbation | PURBEY TARGETS<br>OF CTBP1 AND<br>SATB1 UP                                   | 3.54E-06 | <i>ARID4A:GPR135:CPNE1:COL7A1</i>                                             |
| Chemical and Genetic<br>perturbation | STREICHER LSM1<br>TARGETS UP                                                 | 3.05E-05 | <i>ARID4A:DAAMI:CDC25A</i>                                                    |
| Immunologic signatures               | GSE25123 CTRL VS<br>IL4 AND<br>ROSLITAZONE<br>STIM PPARG KO<br>MACROPHAGE DN | 7.17E-06 | <i>ZBTB16:ANAPC5:NFIX:ACSS2:KLHL18</i>                                        |
| Curated gene sets                    | NIKOLSKY<br>BREAST CANCER<br>20Q11 AMPLICON                                  | 2.84E-22 | <i>MAP1LC3A:ACSS2:MYH7B:TRPC4AP:EDEM2:<br/>FAM83C:UQCC1:GDF5:ERGIC3:CPNE1</i> |
| Curated gene sets                    | LASTOWSKA<br>NEUROBLASTOMA<br>COPY NUMBER DN                                 | 9.36E-07 | <i>CCDC12:SETD2:SCAP:ELP6:SMARCC1:<br/>DHX30:CDC25A:ZNF589:NME6</i>           |
| Curated gene sets                    | PURBEY TARGETS<br>OF CTBP1 AND<br>SATB1 UP                                   | 3.53E-06 | <i>ARID4A:GPR135:CPNE1:COL7A1</i>                                             |
| Curated gene sets                    | REACTOME<br>CHROMATIN<br>ORGANIZATION                                        | 2.93E-05 | <i>KDM2B:ARID4A:SETD2:ELP6:SMARCC1</i>                                        |
| Curated gene sets                    | STREICHER LSM1<br>TARGETS UP                                                 | 3.05E-05 | <i>ARID4A:DAAMI:CDC25A</i>                                                    |
| Reactome                             | REACTOME<br>CHROMATIN<br>ORGANIZATION                                        | 2.93E-05 | <i>KDM2B:ARID4A:SETD2:ELP6:SMARCC1</i>                                        |

341

342

343

344 **R2:**

| Category                          | Gene Set                                       | P-value  | Overlapped genes                                                         |
|-----------------------------------|------------------------------------------------|----------|--------------------------------------------------------------------------|
| GWAS Catalog                      | Hippocampus                                    | 2.19E-22 | <i>WIF1:LEMD3:MSRB3:RNFT2:HRK:FBXW8:TESC:ASTN2</i>                       |
| GWAS Catalog                      | Dentate gyrus                                  | 2.19E-22 | <i>WIF1:LEMD3:MSRB3:RNFT2:HRK:FBXW8:TESC:ASTN2</i>                       |
| GWAS Catalog                      | Alzheimer's disease                            | 1.36E-13 | <i>CREB3L1:DGKZ:MDK:AMBRA1:HARB1:ATG13:ARHGAP1</i>                       |
| GWAS Catalog                      | Waist-to-hip ratio                             | 4.66E-12 | <i>ACSS2:MYH7B:TRPC4AP:EDEM2:FAM83C:UQCC1:GDF5:ERGIC3:CPNE1</i>          |
| GWAS Catalog                      | Immunoglobulin A                               | 2.95E-11 | <i>DGKZ:MDK:AMBRA1:HARB1:ATG13</i>                                       |
| GWAS Catalog                      | Baldness                                       | 4.19E-07 | <i>DMRTA2:FAF1:CDKN2C:HINT3:TRMT11:CENPW</i>                             |
| GWAS Catalog                      | Prothrombin time                               | 4.92E-07 | <i>MYH7B:TRPC4AP:EDEM2</i>                                               |
| GWAS Catalog                      | Schizophrenia                                  | 3.59E-07 | <i>CREB3L1:DGKZ:MDK:AMBRA1:HARB1:ATG13:ARHGAP1:ERGIC3</i>                |
| GWAS Catalog                      | Autism spectrum disorder                       | 1.74E-05 | <i>CREB3L1:DGKZ:MDK:AMBRA1:HARB1:ATG13:ARHGAP1</i>                       |
| GWAS Catalog                      | Reaction time                                  | 2.42E-05 | <i>DGKZ:ATG13:ARHGAP1</i>                                                |
| GWAS Catalog                      | QRS                                            | 3.52E-05 | <i>MYH7B:EDEM2</i>                                                       |
| GWAS Catalog                      | FEV1                                           | 4.72E-05 | <i>FAF1:MSRB3:UQCC1:ASTN2</i>                                            |
| GWAS Catalog                      | Spine bone                                     | 5.65E-05 | <i>UQCC1:GDF5</i>                                                        |
| GWAS Catalog                      | Height                                         | 6.20E-05 | <i>FAM83C:UQCC1:GDF5OS:GDF5:ERGIC3:CPNE1:CENPW</i>                       |
| GWAS Catalog                      | Ischemic stroke                                | 1.13E-04 | <i>FAF1:CDKN2C</i>                                                       |
| GWAS Catalog                      | Alzheimer's disease (onset)                    | 1.69E-04 | <i>RNFT2:HRK</i>                                                         |
| GWAS Catalog                      | Neuroticism                                    | 1.98E-04 | <i>ARHGAP1:RFC5:CENPW</i>                                                |
| Chemical and Genetic perturbation | NIKOLSKY BREAST CANCER 20Q11 AMPLICON          | 4.67E-23 | <i>MAP1LC3A:ACSS2:MYH7B:TRPC4AP:EDEM2:FAM83C:UQCC1:GDF5:ERGIC3:CPNE1</i> |
| Chemical and Genetic perturbation | ROVERSI GLIOMA_COPY_NUMBER_UP                  | 9.75E-08 | <i>CHST1:CREB3L1:DGKZ:MDK:ARHGAP1</i>                                    |
| Chemical and Genetic perturbation | CHICAS RB1 TARGETS CONFLUENT                   | 3.04E-06 | <i>CREB3L1:MDK:ARHGAP1:MSRB3:GDF5:TES:CAV2</i>                           |
| Chemical and Genetic perturbation | WANG CLIM2 TARGETS UP                          | 9.95E-06 | <i>DGKZ:ATG13:UQCC1:CAV2:ASTN2</i>                                       |
| Chemical and Genetic perturbation | HADDAD B LYMPHOCYTE PROGENITOR                 | 1.62E-05 | <i>CDKN2C:RNFT2:HRK:RFC5:GADD45G</i>                                     |
| Immunologic signatures            | GSE7509 UNSTIM VS TNFA IL1B IL6 PGE STIM DC UP | 7.62E-05 | <i>MAP1LC3A:TRPC4AP:EDEM2:HINT3</i>                                      |
| Immunologic signatures            | GSE17721 CTRL VS LPS 6H BMDC UP                | 7.92E-05 | <i>FAF1:CDKN2C:EPS15:GADD45G</i>                                         |
| Immunologic signatures            | GSE17721 CTRL VS CPG 1H BMDC UP                | 7.92E-05 | <i>CDKN2C:CREB3L1:DGKZ:GADD45G</i>                                       |
| Immunologic signatures            | GSE5960 TH1 VS ANERGIC TH1 DN                  | 7.92E-05 | <i>CREB3L1:MDK:TRPC4AP:TES</i>                                           |
| Curated gene sets                 | NIKOLSKY BREAST CANCER 20Q11 AMPLICON          | 4.67E-23 | <i>MAP1LC3A:ACSS2:MYH7B:TRPC4AP:EDEM2:FAM83C:UQCC1:GDF5:ERGIC3:CPNE1</i> |
| Curated gene sets                 | CHICAS RB1 TARGETS CONFLUENT                   | 3.04E-06 | <i>CREB3L1:MDK:ARHGAP1:MSRB3:GDF5:TES:CAV2</i>                           |
| Curated gene sets                 | WANG CLIM2 TARGETS UP                          | 9.96E-06 | <i>DGKZ:ATG13:UQCC1:CAV2:ASTN2</i>                                       |
| Curated gene sets                 | HADDAD B LYMPHOCYTE PROGENITOR                 | 1.62E-05 | <i>CDKN2C:RNFT2:HRK:RFC5:GADD45G</i>                                     |



345 **eTable 8: Brain association studies for the cognitively unimpaired (CU) population from**  
 346 **ADNI and BLSA.** Each ROI was fit with a linear regression model by controlling covariates. –  
 347  $\log_{10}(\text{P-value})$  and Pearson's correlation ( $r$ ) are reported. For the P-values, we also added the sign  
 348 of the ROI's beta coefficient values to indicate the effect's direction. The threshold for Bonferroni  
 349 corrected  $-\log_{10}(\text{P-value})$  is  $> 3.38$ . For the  $r$  values, the ROIs that did not survive the multiple  
 350 comparisons or showed a positive  $r$  (negative  $r$  means brain atrophy) are assigned a value of 0  
 351 for visualization purposes.

| ROI                                    | R1:<br>sign $[-\log_{10}(\text{P-value})]$ | R2:<br>sign $[-\log_{10}(\text{P-value})]$ | R1:<br>$r$ | R2:<br>$r$ |
|----------------------------------------|--------------------------------------------|--------------------------------------------|------------|------------|
| Right Accumbens Area                   | 0.02422                                    | -9.97664                                   | 0          | -0.01843   |
| Left Accumbens Area                    | -0.74491                                   | -5.85925                                   | 0          | 0.02215    |
| Right Amygdala                         | -2.48324                                   | -116.367                                   | 0          | -0.32023   |
| Left Amygdala                          | -0.49706                                   | -128.307                                   | 0          | -0.35099   |
| Right Caudate                          | 13.1087                                    | 0.31537                                    | 0.11551    | 0          |
| Left Caudate                           | 13.4701                                    | -0.09992                                   | 0.12082    | 0          |
| Right Cerebellum<br>Exterior           | -1.22265                                   | -3.19868                                   | 0          | 0          |
| Left Cerebellum Exterior               | -2.79468                                   | -3.67638                                   | 0          | -0.02158   |
| Right Hippocampus                      | -3.06027                                   | -170.382                                   | 0          | -0.41714   |
| Left Hippocampus                       | -1.10676                                   | -155.177                                   | 0          | -0.37296   |
| Right Pallidum                         | 0.58246                                    | 0.34191                                    | 0          | 0          |
| Left Pallidum                          | 0.24224                                    | -0.00182                                   | 0          | 0          |
| Right Putamen                          | -1.31769                                   | -1.29282                                   | 0          | 0          |
| Left Putamen                           | -0.65712                                   | -1.74109                                   | 0          | 0          |
| Right Thalamus Proper                  | -0.79193                                   | -3.88437                                   | 0          | 0.02803    |
| Left Thalamus Proper                   | -1.17706                                   | -3.62831                                   | 0          | 0.03503    |
| Cerebellar Vermal<br>Lobules I-V       | -4.13432                                   | -0.07438                                   | -0.08298   | 0          |
| Cerebellar Vermal<br>Lobules VI-VII    | 0.66074                                    | 1.69841                                    | 0          | 0          |
| Cerebellar Vermal<br>Lobules VIII-X    | -0.13531                                   | -3.29106                                   | 0          | 0          |
| Left Basal Forebrain                   | 1.52331                                    | -4.46827                                   | 0          | 0.01873    |
| Right Basal Forebrain                  | 1.44434                                    | -2.36463                                   | 0          | 0          |
| Right ACgG anterior<br>cingulate gyrus | -0.14346                                   | 0.11605                                    | 0          | 0          |
| Left ACgG anterior<br>cingulate gyrus  | -0.47404                                   | 2.92022                                    | 0          | 0          |
| Right AIns anterior<br>insula          | -6.19075                                   | -0.90888                                   | -0.09814   | 0          |
| Left AIns anterior insula              | -3.9446                                    | -1.54477                                   | -0.08014   | 0          |
| Right AOrG anterior<br>orbital gyrus   | -0.25551                                   | 0.10997                                    | 0          | 0          |
| Left AOrG anterior<br>orbital gyrus    | -0.0104                                    | 0.51573                                    | 0          | 0          |
| Right AnG angular<br>gyrus             | -44.3189                                   | 2.29514                                    | -0.25141   | 0          |
| Left AnG angular gyrus                 | -34.0593                                   | 2.69873                                    | -0.23458   | 0          |
| Right Calc calcarine<br>cortex         | 0.95427                                    | 1.3806                                     | 0          | 0          |
| Left Calc calcarine<br>cortex          | 1.60106                                    | 2.3469                                     | 0          | 0          |
| Right CO central<br>operculum          | -21.4518                                   | 3.68169                                    | -0.1368    | 0.17626    |
| Left CO central<br>operculum           | -30.7951                                   | 2.13474                                    | -0.21934   | 0          |
| Right Cun cuneus                       | -1.30454                                   | 0.15463                                    | 0          | 0          |
| Left Cun cuneus                        | -0.85633                                   | 0.089                                      | 0          | 0          |

|                                                  |          |          |          |          |
|--------------------------------------------------|----------|----------|----------|----------|
| Right Ent entorhinal area                        | -0.48193 | -94.2836 | 0        | -0.31755 |
| Left Ent entorhinal area                         | -1.47259 | -112.902 | 0        | -0.36522 |
| Right FO frontal operculum                       | -4.71612 | 3.50542  | -0.08757 | 0.14387  |
| Left FO frontal operculum                        | -7.80919 | 4.71573  | -0.06409 | 0.18985  |
| Right FRP frontal pole                           | -1.78447 | 7.39516  | 0        | 0.1951   |
| Left FRP frontal pole                            | -6.25577 | 2.96574  | -0.0413  | 0        |
| Right FuG fusiform gyrus                         | -11.3483 | -3.99863 | -0.16477 | -0.02522 |
| Left FuG fusiform gyrus                          | -20.5362 | -4.72936 | -0.20459 | -0.0245  |
| Right GRe gyrus rectus                           | -0.99644 | 0.36732  | 0        | 0        |
| Left GRe gyrus rectus                            | 0.08139  | -0.71079 | 0        | 0        |
| Right IOG inferior occipital gyrus               | -0.56007 | 0.76815  | 0        | 0        |
| Left IOG inferior occipital gyrus                | 0.10238  | 3.30977  | 0        | 0        |
| Right ITG inferior temporal gyrus                | -79.5925 | -0.43182 | -0.36824 | 0        |
| Left ITG inferior temporal gyrus                 | -54.6705 | -2.45957 | -0.33551 | 0        |
| Right LiG lingual gyrus                          | -1.10594 | -1.03965 | 0        | 0        |
| Left LiG lingual gyrus                           | 0.21369  | -0.22744 | 0        | 0        |
| Right LOrG lateral orbital gyrus                 | 5.96812  | 7.65209  | 0.03279  | 0.11501  |
| Left LOrG lateral orbital gyrus                  | 1.44208  | 8.75206  | 0        | 0.19311  |
| Right MCgG middle cingulate gyrus                | 0.07973  | 3.16878  | 0        | 0        |
| Left MCgG middle cingulate gyrus                 | -0.05795 | 4.14204  | 0        | 0.13171  |
| Right MFC medial frontal cortex                  | 1.08139  | -1.51896 | 0        | 0        |
| Left MFC medial frontal cortex                   | 3.58839  | -0.78213 | 0.05774  | 0        |
| Right MFG middle frontal gyrus                   | -2.90496 | 15.8988  | 0        | 0.18026  |
| Left MFG middle frontal gyrus                    | -3.27888 | 15.1054  | 0        | 0.18331  |
| Right MOG middle occipital gyrus                 | -13.2238 | 2.98902  | -0.18857 | 0        |
| Left MOG middle occipital gyrus                  | -22.4568 | 0.45539  | -0.21777 | 0        |
| Right MORG medial orbital gyrus                  | 2.26776  | 3.89384  | 0        | 0.11455  |
| Left MORG medial orbital gyrus                   | 7.10968  | 3.86849  | 0.00986  | 0.07279  |
| Right MPoG postcentral gyrus medial segment      | 4.26336  | 2.28323  | 0.08468  | 0        |
| Left MPoG postcentral gyrus medial segment       | -0.976   | 0.98263  | 0        | 0        |
| Right MPrG precentral gyrus medial segment       | 1.7376   | 2.1092   | 0        | 0        |
| Left MPrG precentral gyrus medial segment        | 3.86669  | 3.14416  | 0.03619  | 0        |
| Right MSFG superior frontal gyrus medial segment | -1.9857  | 3.71251  | 0        | 0.15299  |
| Left MSFG superior frontal gyrus medial segment  | -3.80664 | 1.50272  | -0.03031 | 0        |
| Right MTG middle temporal gyrus                  | -78.7893 | -1.42619 | -0.32799 | 0        |
| Left MTG middle temporal gyrus                   | -88.6047 | -3.09453 | -0.35737 | 0        |

|                                                          |          |          |          |          |
|----------------------------------------------------------|----------|----------|----------|----------|
| Right OCP occipital pole                                 | 9.10347  | 1.57333  | 0.08553  | 0        |
| Left OCP occipital pole                                  | 11.9957  | 7.11525  | 0.12456  | 0.1673   |
| Right OFuG occipital fusiform gyrus                      | -0.44305 | 1.93927  | 0        | 0        |
| Left OFuG occipital fusiform gyrus                       | -7.02536 | -2.44769 | -0.14617 | 0        |
| Right OpIFG opercular part of the inferior frontal gyrus | -11.9213 | 4.95626  | -0.13442 | 0.16631  |
| Left OpIFG opercular part of the inferior frontal gyrus  | -11.1503 | 2.94214  | -0.10786 | 0        |
| Right OrIFG orbital part of the inferior frontal gyrus   | 0.70391  | 2.36786  | 0        | 0        |
| Left OrIFG orbital part of the inferior frontal gyrus    | 1.81898  | 2.94668  | 0        | 0        |
| Right PCgG posterior cingulate gyrus                     | -15.3029 | -1.77989 | -0.19969 | 0        |
| Left PCgG posterior cingulate gyrus                      | -11.5197 | -0.61498 | -0.17758 | 0        |
| Right PCu precuneus                                      | -29.9026 | 2.54008  | -0.2271  | 0        |
| Left PCu precuneus                                       | -19.8806 | 1.80214  | -0.17966 | 0        |
| Right PHG parahippocampal gyrus                          | -16.582  | -109.089 | -0.16942 | -0.32044 |
| Left PHG parahippocampal gyrus                           | -11.9967 | -127.379 | -0.16249 | -0.35343 |
| Right PIns posterior insula                              | -12.4309 | -0.60413 | -0.14632 | 0        |
| Left PIns posterior insula                               | -19.8889 | -2.07986 | -0.1697  | 0        |
| Right PO parietal operculum                              | -1.49742 | 3.12846  | 0        | 0        |
| Left PO parietal operculum                               | -2.05314 | 5.69654  | 0        | 0.14372  |
| Right PoG postcentral gyrus                              | -11.147  | 15.9636  | -0.14717 | 0.22742  |
| Left PoG postcentral gyrus                               | -7.26167 | 6.01063  | -0.13704 | 0.15154  |
| Right POrG posterior orbital gyrus                       | 1.78048  | 0.45129  | 0        | 0        |
| Left POrG posterior orbital gyrus                        | 3.11751  | 0.99777  | 0        | 0        |
| Right PP planum polare                                   | -10.2705 | 0.14541  | -0.06999 | 0        |
| Left PP planum polare                                    | -2.33648 | 1.43902  | 0        | 0        |
| Right PrG precentral gyrus                               | -1.58787 | 19.0602  | 0        | 0.23317  |
| Left PrG precentral gyrus                                | -1.27245 | 23.2786  | 0        | 0.23342  |
| Right PT planum temporale                                | -7.95868 | 5.77427  | -0.08165 | 0.18999  |
| Left PT planum temporale                                 | -13.6171 | 0.3216   | -0.16147 | 0        |
| Right SCA subcallosal area                               | 12.1687  | 3.36894  | 0.02896  | 0        |
| Left SCA subcallosal area                                | 11.271   | 1.70392  | 0.01615  | 0        |
| Right SFG superior frontal gyrus                         | -0.74848 | 11.4176  | 0        | 0.19607  |
| Left SFG superior frontal gyrus                          | -1.90879 | 11.9413  | 0        | 0.17828  |
| Right SMC supplementary motor cortex                     | 1.36407  | 2.92348  | 0        | 0        |
| Left SMC supplementary motor cortex                      | 0.28531  | 1.30349  | 0        | 0        |

|                                                                 |          |          |          |          |
|-----------------------------------------------------------------|----------|----------|----------|----------|
| Right SMG<br>supramarginal gyrus                                | -47.9769 | 3.07503  | -0.33785 | 0        |
| Left SMG<br>supramarginal gyrus                                 | -60.9529 | 3.41068  | -0.37277 | 0.10429  |
| Right SOG superior<br>occipital gyrus                           | -2.9757  | 0.45344  | 0        | 0        |
| Left SOG superior<br>occipital gyrus                            | -0.70766 | 3.84876  | 0        | 0.12067  |
| Right SPL superior<br>parietal lobule                           | -7.51241 | 1.52569  | -0.17257 | 0        |
| Left SPL superior<br>parietal lobule                            | -12.5112 | 1.79292  | -0.19693 | 0        |
| Right STG superior<br>temporal gyrus                            | -19.5533 | 0.52986  | -0.18466 | 0        |
| Left STG superior<br>temporal gyrus                             | -14.7256 | 0.67456  | -0.18506 | 0        |
| Right TMP temporal<br>pole                                      | -47.7076 | -21.6918 | -0.28679 | -0.12042 |
| Left TMP temporal pole                                          | -38.7424 | -21.3961 | -0.26189 | -0.12065 |
| Right TrIFG triangular<br>part of the inferior frontal<br>gyrus | 0.86865  | 1.19197  | 0        | 0        |
| Left TrIFG triangular<br>part of the inferior frontal<br>gyrus  | 0.33749  | 0.66059  | 0        | 0        |
| Right TTG transverse<br>temporal gyrus                          | -0.73044 | 0.83119  | 0        | 0        |
| Left TTG transverse<br>temporal gyrus                           | 0.26298  | 0.05257  | 0        | 0        |

352

353

354 **eTable 9: Clinical association studies for the cognitively unimpaired (CU) population from**  
 355 **ADNI and BLSA.** Each clinical variable/biomarker was fit with a linear regression model by  
 356 controlling covariates.  $-\log_{10}(\text{P-value})$  and the coefficient of each variable/biomarker (beta) are  
 357 reported. For the P-values, we added the sign of the variable's beta coefficient values to indicate  
 358 the effect's direction. The threshold for Bonferroni corrected  $-\log_{10}(\text{P-value})$  is  $> 2.95$ . For the  
 359 beta values, the ROIs that did not survive the multiple comparisons are assigned a value of 0.

| Variable                | R1:<br>sign[-log <sub>10</sub> (P-value)] | R2:<br>sign[-log <sub>10</sub> (P-value)] | R1:<br>beta | R2:<br>beta |
|-------------------------|-------------------------------------------|-------------------------------------------|-------------|-------------|
| FAQ_Total               | 0.03592                                   | 0.1324                                    | 0           | 0           |
| CDR_Global              | 0.2549                                    | 0.68368                                   | 0           | 0           |
| CDR_SOB                 | 0.46167                                   | 0.38305                                   | 0           | 0           |
| NPIQ_Total              | -0.02945                                  | -1.85116                                  | 0           | 0           |
| DSST                    | 0.79779                                   | -0.17017                                  | 0           | 0           |
| TMT_A                   | 1.04091                                   | 0.26962                                   | 0           | 0           |
| TMT_B                   | 0.38981                                   | 1.39854                                   | 0           | 0           |
| MMSE                    | -0.42715                                  | -0.69585                                  | 0           | 0           |
| Digit_Span_Backward     | -1.11892                                  | -0.4529                                   | 0           | 0           |
| Digit_Span_Forward      | -0.5489                                   | 0.15144                                   | 0           | 0           |
| MOCA                    | -0.1209                                   | 0.046                                     | 0           | 0           |
| BNT                     | 0.18498                                   | -0.7789                                   | 0           | 0           |
| RAVLT                   | 0.75931                                   | -0.16779                                  | 0           | 0           |
| RAVLT_IM                | 1.02925                                   | 0.03534                                   | 0           | 0           |
| RAVLT_Short             | 0.41472                                   | -0.42162                                  | 0           | 0           |
| RAVLT_Long              | 0.35987                                   | -0.51004                                  | 0           | 0           |
| LM_DEL_A                | 0.05756                                   | 0.17738                                   | 0           | 0           |
| LM_IM_A                 | -0.26376                                  | 0.45558                                   | 0           | 0           |
| ANI_Fluency             | 0.07071                                   | 0.20993                                   | 0           | 0           |
| VEG_Fluency             | -0.02664                                  | 0.40168                                   | 0           | 0           |
| TS_RATIO                | 1.86587                                   | -0.00366                                  | 0           | 0           |
| TS_RATIO_ADJ            | 1.97264                                   | -0.12439                                  | 0           | 0           |
| BNT_percent             | 0.18498                                   | -0.7789                                   | 0           | 0           |
| Cholesterol             | -1.56606                                  | -0.18187                                  | 0           | 0           |
| Diastole                | 0.3944                                    | -0.05256                                  | 0           | 0           |
| Glucose                 | 0.67578                                   | -0.66702                                  | 0           | 0           |
| Systole                 | 0.84884                                   | -0.22012                                  | 0           | 0           |
| Triglycerides           | -0.23883                                  | -0.35205                                  | 0           | 0           |
| ABETA42_ADNI            | -0.15777                                  | -0.07168                                  | 0           | 0           |
| PTAU                    | -0.30024                                  | 1.00901                                   | 0           | 0           |
| TAU                     | -0.29778                                  | 0.82113                                   | 0           | 0           |
| Diabetes                | 1.08237                                   | 0.02205                                   | 0           | 0           |
| Hypertension            | -0.28435                                  | -0.28563                                  | 0           | 0           |
| Diagnosis_Depression    | -0.59092                                  | 0.04985                                   | 0           | 0           |
| Alcoholic               | -0.22664                                  | 2.69173                                   | 0           | 0           |
| Family_History_Dementia | -0.58766                                  | 0.17379                                   | 0           | 0           |
| Ethnicity               | 1.44783                                   | 0.02901                                   | 0           | 0           |
| Height                  | -0.01913                                  | -0.29661                                  | 0           | 0           |
| BMI                     | 0.01531                                   | -0.98463                                  | 0           | 0           |
| Weight                  | 0.01957                                   | -0.95236                                  | 0           | 0           |
| SPARE_AD                | 75.0432                                   | 138.158                                   | 0.12597     | 0.14245     |
| SPARE_BA                | 14.9898                                   | -3.16218                                  | 0.0059      | -0.00218    |
| AV45_PET_ADNI           | 0.42998                                   | 1.17676                                   | 0           | 0           |
| FDG                     | 0.58558                                   | -1.02347                                  | 0           | 0           |
| WMLS_Volume_701         | 6.92099                                   | 1.98594                                   | 5.70E-06    | 0           |

361

362 **References**

- 363 1. Yang, Z., Wen, J. & Davatzikos, C. Surreal-GAN:Semi-Supervised Representation Learning  
364 via GAN for uncovering heterogeneous disease-related imaging patterns. *ICLR* (2021).
- 365 2. Yang, Z. *et al.* A deep learning framework identifies dimensional representations of  
366 Alzheimer's Disease from brain structure. *Nat Commun* **12**, 7065 (2021).
- 367 3. Dong, A., Honnorat, N., Gaonkar, B. & Davatzikos, C. CHIMERA: Clustering of  
368 Heterogeneous Disease Effects via Distribution Matching of Imaging Patterns. *IEEE Trans.*  
369 *Med. Imaging* **35**, 612–621 (2016).
- 370 4. Varol, E., Sotiras, A. & Davatzikos, C. HYDRA: Revealing heterogeneity of imaging and  
371 genetic patterns through a multiple max-margin discriminative analysis framework.  
372 *NeuroImage* **145**, 346–364 (2017).
- 373 5. Wen, J. *et al.* Multi-scale semi-supervised clustering of brain images: Deriving disease  
374 subtypes. *Med Image Anal* **75**, 102304 (2021).
- 375 6. Wen, J. *et al.* Subtyping brain diseases from imaging data. Preprint at  
376 <https://doi.org/10.48550/arXiv.2202.10945> (2022).
- 377 7. Young, A. L. *et al.* Uncovering the heterogeneity and temporal complexity of  
378 neurodegenerative diseases with Subtype and Stage Inference. *Nat Commun* **9**, 4273 (2018).
- 379 8. Petersen, R. C. *et al.* Alzheimer's Disease Neuroimaging Initiative (ADNI): clinical  
380 characterization. *Neurology* **74**, 201–209 (2010).
- 381 9. Resnick, S. M. *et al.* One-year age changes in MRI brain volumes in older adults. *Cereb*  
382 *Cortex* **10**, 464–472 (2000).
- 383 10. Miller, K. L. *et al.* Multimodal population brain imaging in the UK Biobank prospective  
384 epidemiological study. *Nat Neurosci* **19**, 1523–1536 (2016).

- 385 11. Watanabe, K., Taskesen, E., van Bochoven, A. & Posthuma, D. Functional mapping and  
386 annotation of genetic associations with FUMA. *Nat Commun* **8**, 1826 (2017).
- 387 12. Yang, J. *et al.* FTO genotype is associated with phenotypic variability of body mass  
388 index. *Nature* **490**, 267–272 (2012).
- 389 13. Choi, S. W., Mak, T. S.-H. & O'Reilly, P. F. Tutorial: a guide to performing polygenic  
390 risk score analyses. *Nat Protoc* **15**, 2759–2772 (2020).
- 391
